# Supplementary material for: An imidazole functionalized aqua-stable metal–organic framework for selective fluorogenic detection of herbicide DNOC and antibacterial agent furaltadone in various biological and environmental specimens
Source: Royal Society of Chemistry journal article supplement (doi:10.1039/d4dt02204a), 2024-01-01
Supplement: d4dt02204a1.pdf [file d4dt02204a1.pdf]

## Supporting Information For:

### **An Imidazole Functionalized Aqua-Stable Metal-Organic Framework for Selective Fluorogenic Detection of Herbicide DNOC and Antibacterial Agent Furaltadone in Various Biological and Environmental Specimens**

*Subhrajyoti Ghosh,<sup>€</sup> Sk Sakir Hossain,<sup>€</sup> and Shyam Biswas\**

Department of Chemistry, Indian Institute of Technology Guwahati, 781039, Assam, India.

*<sup>€</sup>Equal contribution*

\*Corresponding author. Tel: 91-3612583309

E-mail address: sbiswas@iitg.ac.in

### **Materials and Characterization Methods:**

All of the chemicals were purchased from commercial suppliers and used directly. The 2-(2-((1H-imidazol-2-yl)methylene)hydrazinyl)terephthalic acid linker (H<sub>2</sub>L) was prepared according to the below mentioned procedure. The Attenuated Total Reflectance Infrared (ATR-IR) spectra were recorded using PerkinElmer UATR Two at the ambient condition in the region 400-4000 cm<sup>-1</sup>. The notations used for characterization of the bands are broad (br), strong (s), very strong (vs), medium (m), weak (w) and shoulder (sh). Fluorescence sensing studies were performed with a HORIBA JOBIN YVON Fluoromax-4 spectrofluorometer. A Bruker Avance III 600 NMR spectrometer was used for recording <sup>1</sup>H and <sup>13</sup>C NMR spectra at 125 MHz. Thermogravimetric analysis (TGA) was carried out with a Netzsch STA-409CD thermal analyzer in the temperature range of 30-700 °C in an O<sub>2</sub> atmosphere at the heating rate of 4 °C min<sup>-1</sup>. PXRD data were collected by using Rigaku Smartlab X-ray diffractometer with Cu-Kα radiation, 40 kV of operating voltage and 125 mA of operating current. N<sub>2</sub> sorption isotherms were recorded by using Quantachrome Quadrasorb evo volumetric gas adsorption equipment at -196 °C. Before the sorption analysis, the degassing of the compound was carried out at 100 °C under a high vacuum for 24 h. Gemini 500 was utilized for Energy Dispersive X-rays spectrometer (EDX) for elemental characterization. FE-SEM images were captured with a Zeiss (SIGMA 300) scanning electron microscope. Pawley refinement was carried out using Materials Studio software.<sup>1</sup>

### **Preparation MOF (1') Suspension for Fluorescence Experiments:**

We chose water as a sensing medium for the fluorometric detection of DNOC and furaltadone with the thermally activated MOF (1'). For the sensing of targeted analytes, 4 mg of 1' was suspended in 4 mL of distilled water. Subsequently, the prepared suspension was left undisturbed at room temperature overnight to ensure its stability. For the fluorescence experiment, 300 μL of the aforementioned stable suspension was carefully transferred into a quartz container, containing 3 mL of distilled water. Fluorescence measurements were then conducted across the wavelength range of 430-650 nm, with excitation wavelength of 361 nm.

### **Fluorometric Detection of Furaltadone in Blood Serum Sample:**

A 10 mL of blood sample was collected and centrifuged at 10,000 rpm for 15 min to obtain blood plasma. The light-yellow blood serum was collected by centrifugation and stored in a Falcon tube at -20 °C. To conduct fluorescence detection experiments, varying concentrations of furaltadone were added to different aliquots of the blood serum sample containing a MOF suspended in HEPES buffer (pH = 7.4).

### **Fluorometric Detection of Furaltadone in Urine Sample:**

A 10 mL urine sample was collected from a healthy individual. Thereafter, the sample was centrifuged at 8000 rpm for 10 min, and the supernatant was used for the experiments. To conduct fluorescence experiments, various amounts of furaltadone were added to the urine samples containing a HEPES buffer suspension of the probe.

### **Quantum Yield Measurement:**

Here, we have utilised the Parker-Rees method to calculate the quantum yield of the prepared MOF, using a 0.5 M H<sub>2</sub>SO<sub>4</sub> solution of quinine sulphate as a standard reference.<sup>2</sup> The formula for this calculation is provided as follows:

$$\Phi_s = (A_r F_s n_s^2 / A_s F_r n_r^2) \Phi_r \dots\dots\dots(\text{Equation-1})$$

In this equation,  $\Phi_r$  represents the quantum yield of the quinine sulphate reference solution, while  $\Phi_s$  represents the quantum yield of the sample. The values of  $A_r$  and  $A_s$  correspond to the absorbance of the reference and sample, respectively, whereas  $F_r$  and  $F_s$  refer to the integrated area of fluorescence intensity for the reference and sample, respectively. The refractive indices of the reference and sample are represented by  $n_r$  and  $n_s$ , respectively. Table S1 contains the relevant photophysical parameters and quantum yield values.

**Table S1.** Quantum yield of quinine sulphate, **1'**, and analyte treated **1'**.

| Sl. No. | Sample Name                         | Excitation Wavelength $\lambda_{ex}$ (nm) | Absorbance (A) | Area of Integrated Fluorescence Intensity (F) | Quantum Yield ( $\Phi$ ) |
|---------|-------------------------------------|-------------------------------------------|----------------|-----------------------------------------------|--------------------------|
| 1       | Quinine Sulphate                    | 344                                       | 0.097          | 3.88E7                                        | 0.546                    |
| 2       | <b>1'</b>                           | 361                                       | 0.072          | 5.78E6                                        | 0.107                    |
| 3       | <b>1'</b> after treatment with DNOC | 361                                       | 0.076          | 2.64E6                                        | 0.049                    |
| 4       | <b>1'</b> after treatment with FLT  | 361                                       | 0.074          | 2.10E6                                        | 0.038                    |

### **Synthetic Procedure for 2-(2-((1H-Imidazol-2-yl)Methylene)Hydrazinyl)Terephthalic Acid (H<sub>2</sub>L) Linker:**

The linker was synthesized in two steps. In first step, we have synthesized the 2-hydrazineylterephthalic acid by following the reported literature.<sup>3</sup> In second step, 196 mg of 2-hydrazineylterephthalic acid (1 mmol) and 96 mg (1 mmol) of imidazole 2-carboxaldehyde were dissolved in 10 mL of anhydrous MeOH. After that, the reaction mixture was refluxed for 24 h under N<sub>2</sub> atmosphere. After the completion of the reaction the reaction mixture was allowed to cool down to room temperature. The solvent was removed through evaporation under reduced pressure. Finally, the obtained yellow colored product was dried in a hot air oven at 80 °C. Yield: 750 mg (2.38 mmol, 91%). <sup>1</sup>H NMR (500 MHz, DMSO-d<sub>6</sub>):  $\delta$  = 11.60 (s, 1H), 8.31 (s, 1H), 8.15 (s, 1H), 7.96-7.94 (d, 1H), 7.34-7.32 (d, 1H), 7.19 (d, 2H) ppm. <sup>13</sup>C NMR (125 MHz, DMSO-d<sub>6</sub>):  $\delta$  = 169.22, 167.77, 167.31, 167.16, 146.44, 143.09, 141.56, 135.74, 131.58, 123.77, 118.25, 114.44 ppm. HR-MS (m/z): 275.0778 for (M+H)<sup>+</sup> ion (M = 274.0702, mass of H<sub>2</sub>L linker). In Figures S1-S3, the NMR and mass spectra of the H<sub>2</sub>L linker are shown.

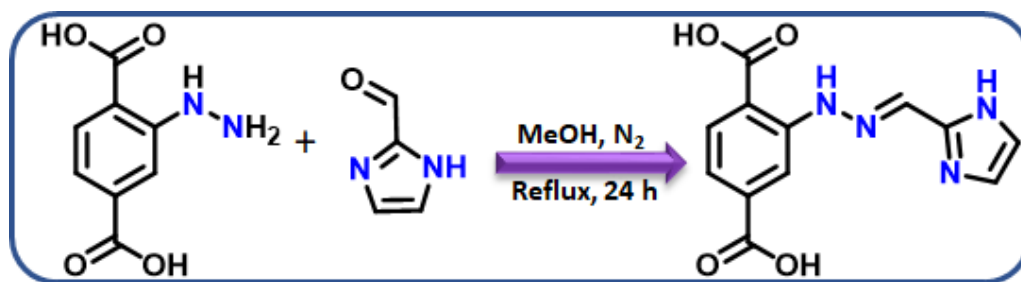

**Scheme S1.** Reaction scheme for the synthesis of H<sub>2</sub>L linker.

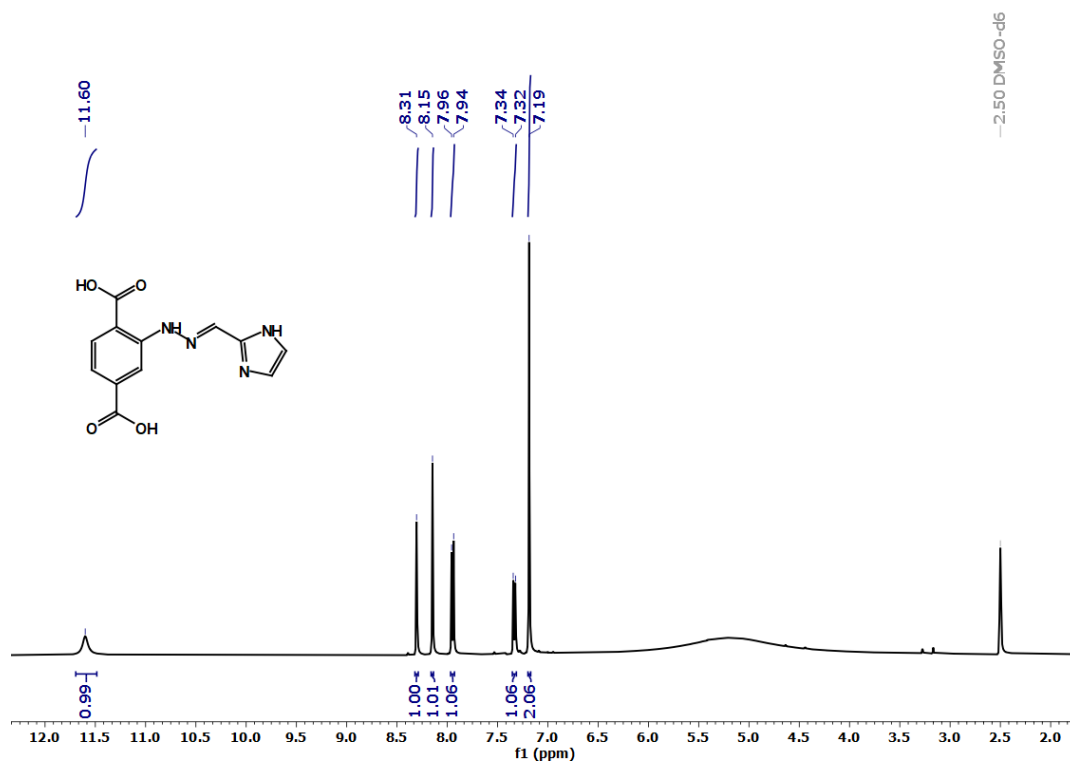

**Figure S1.** <sup>1</sup>H NMR spectrum (500 MHz, DMSO-d<sub>6</sub>) of H<sub>2</sub>L linker.

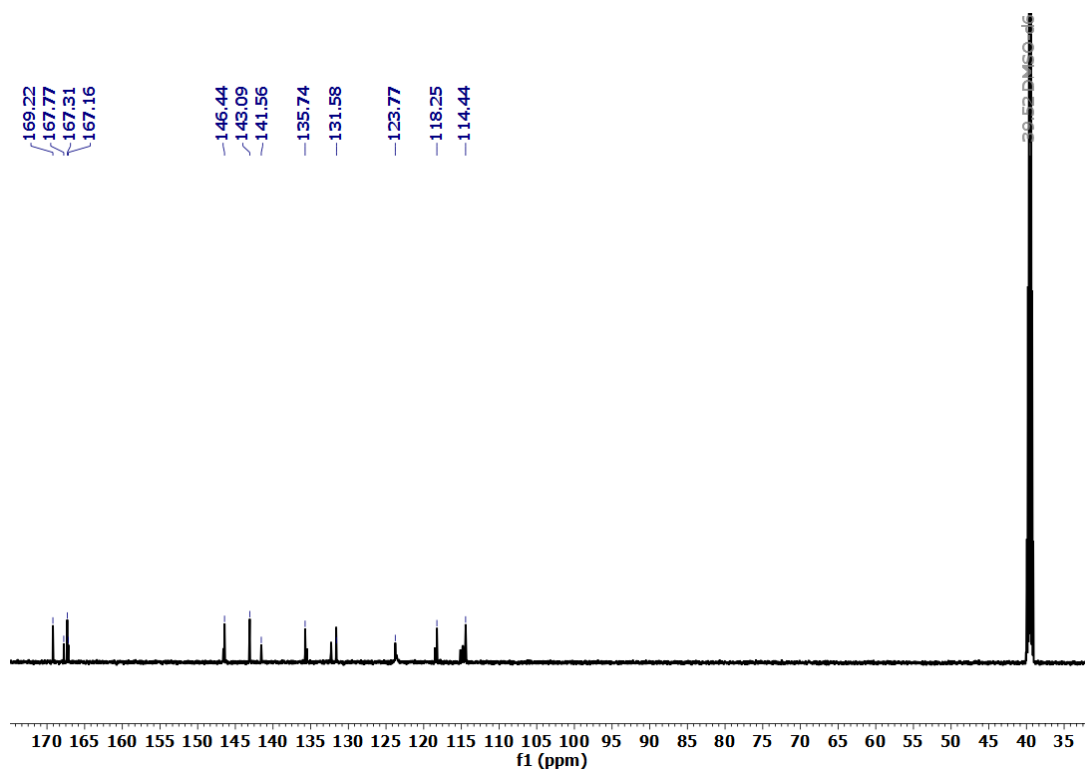

**Figure S2.**  $^{13}\text{C}$  NMR spectrum (125 MHz,  $\text{DMSO-d}_6$ ) of  $\text{H}_2\text{L}$  linker.

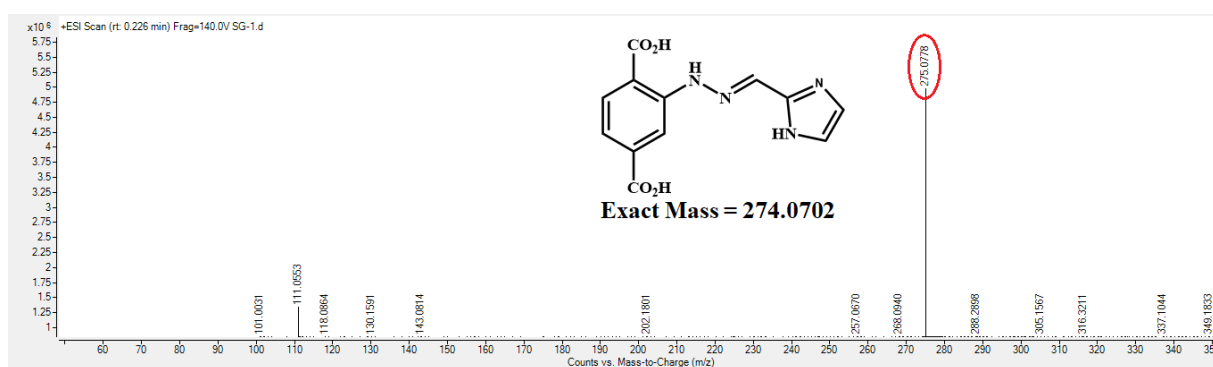

**Figure S3.** ESI-MS spectrum of  $\text{H}_2\text{L}$  linker measured in methanol. The spectrum shows  $m/z$  peak at 275.0778, which corresponds to  $(\text{M}+\text{H})^+$  ion ( $\text{M}$  = mass of 2-(2-((1H-imidazol-2-yl)methylene)hydrazinyl)terephthalic acid linker).

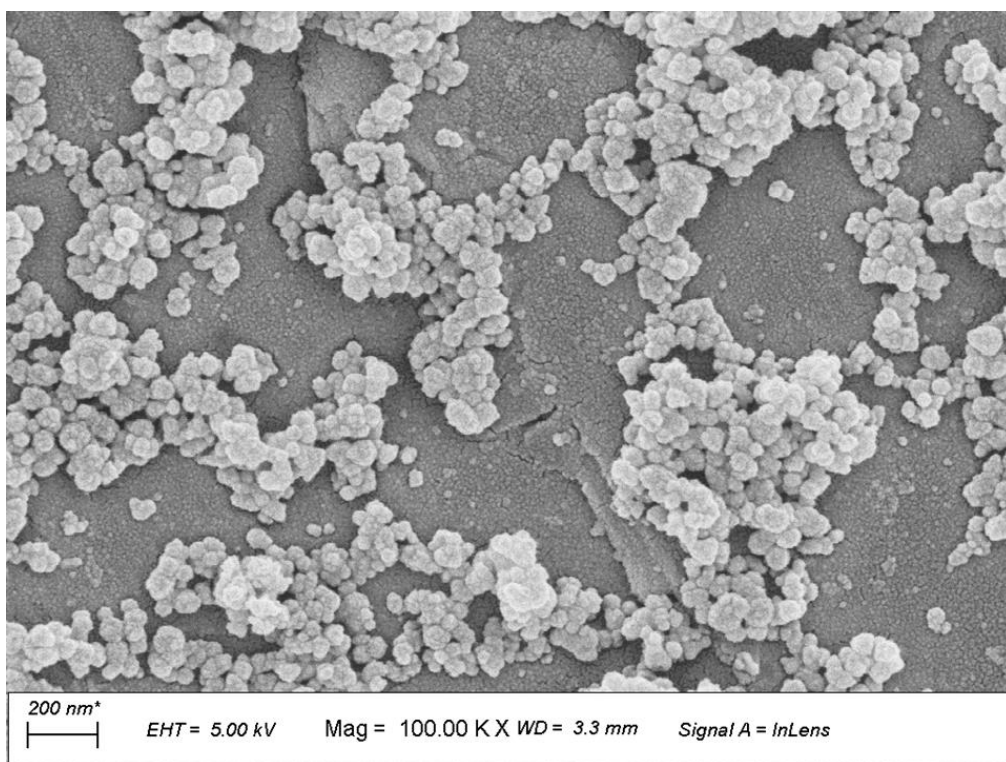

**Figure S4.** FE-SEM image of **1**.

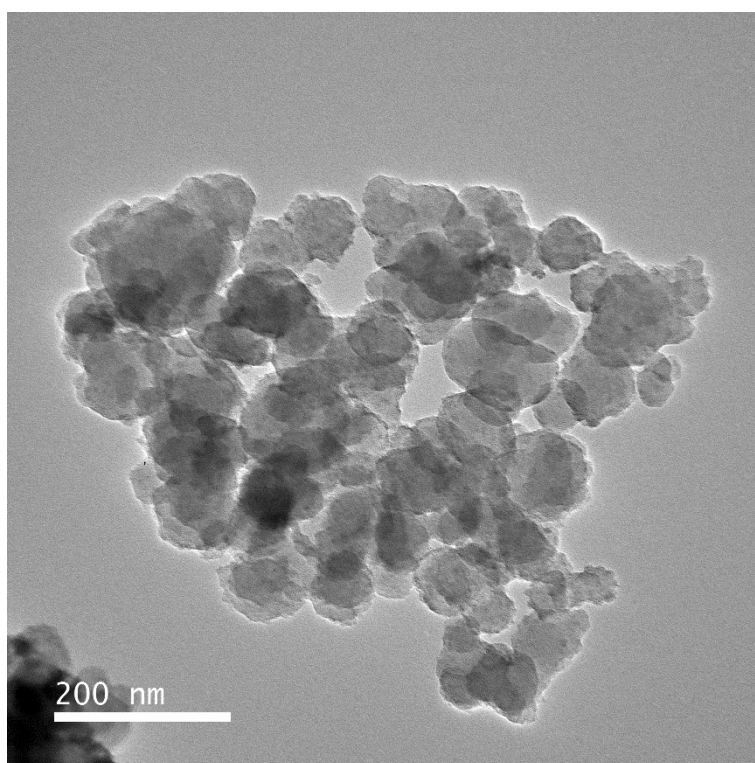

**Figure S5.** FE-TEM image of **1**.

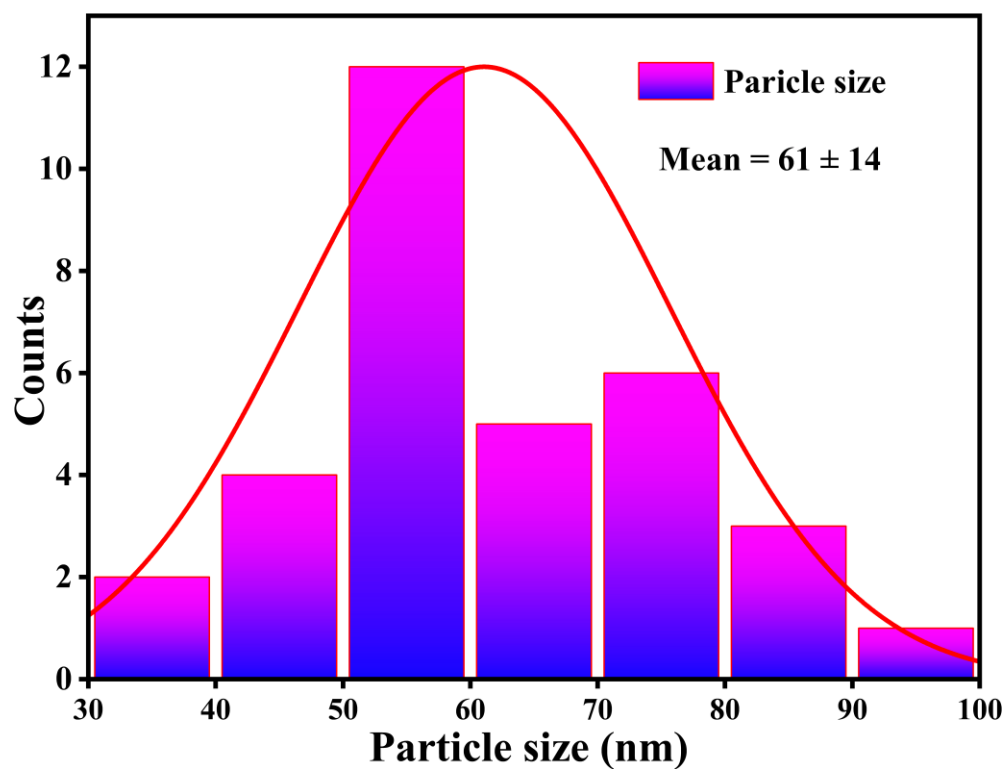

**Figure S6.** Particle size distribution plot for 1' (particle sizes were obtained from obtained the TEM images).

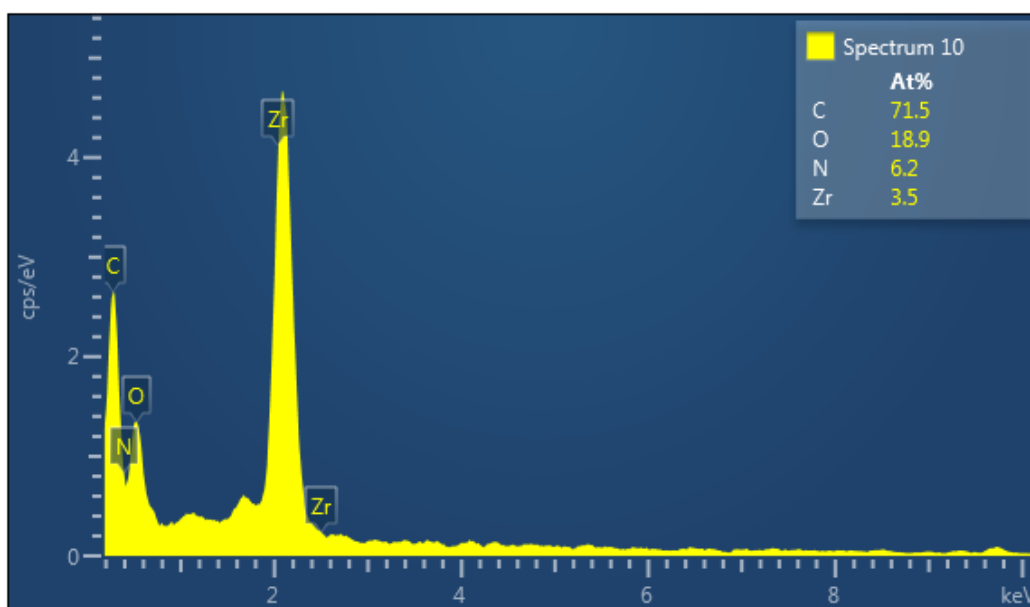

**Figure S7.** EDX spectrum of 1.

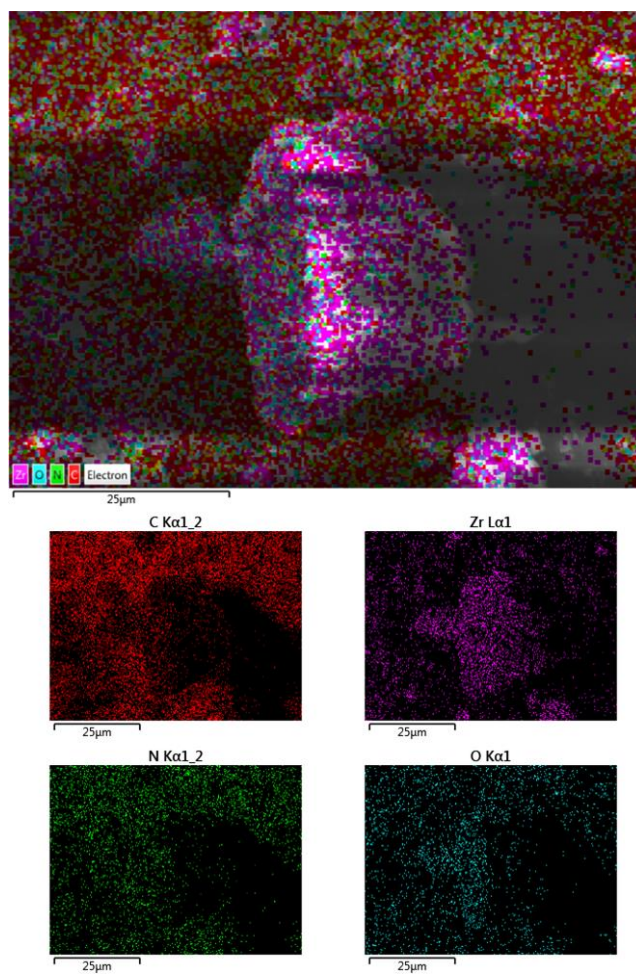

**Figure S8.** EDX elemental mapping of expected elements present in **1**.



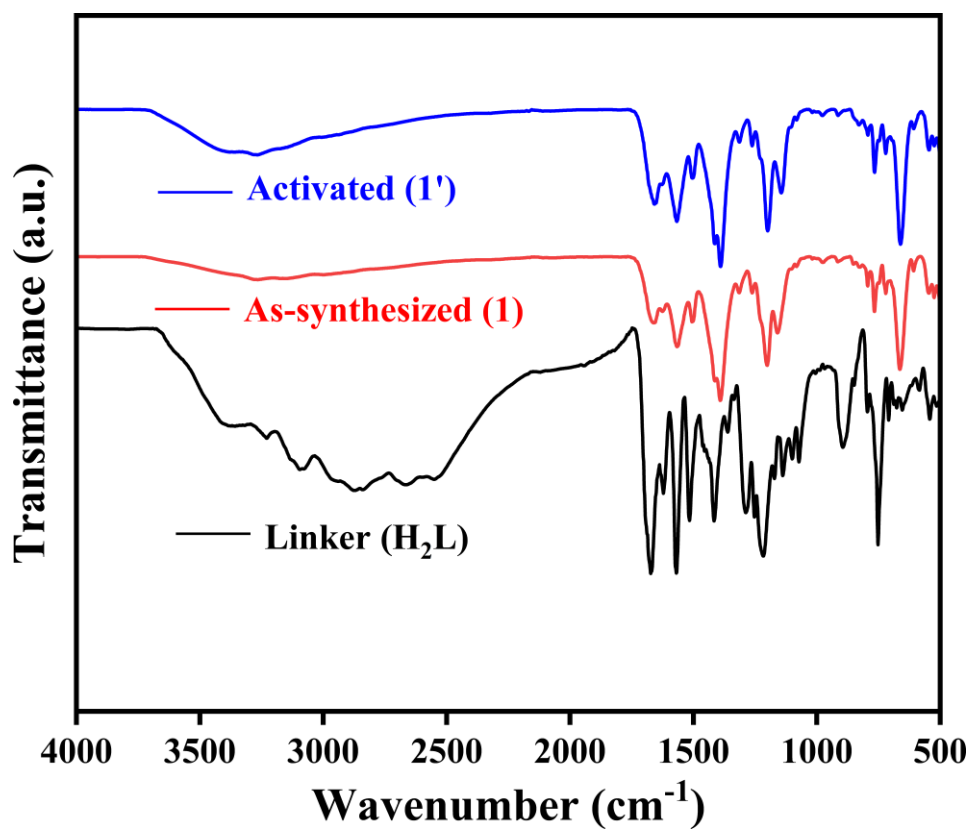

**Figure S9.** ATR-IR spectra of H<sub>2</sub>L linker, **1** and **1'**.

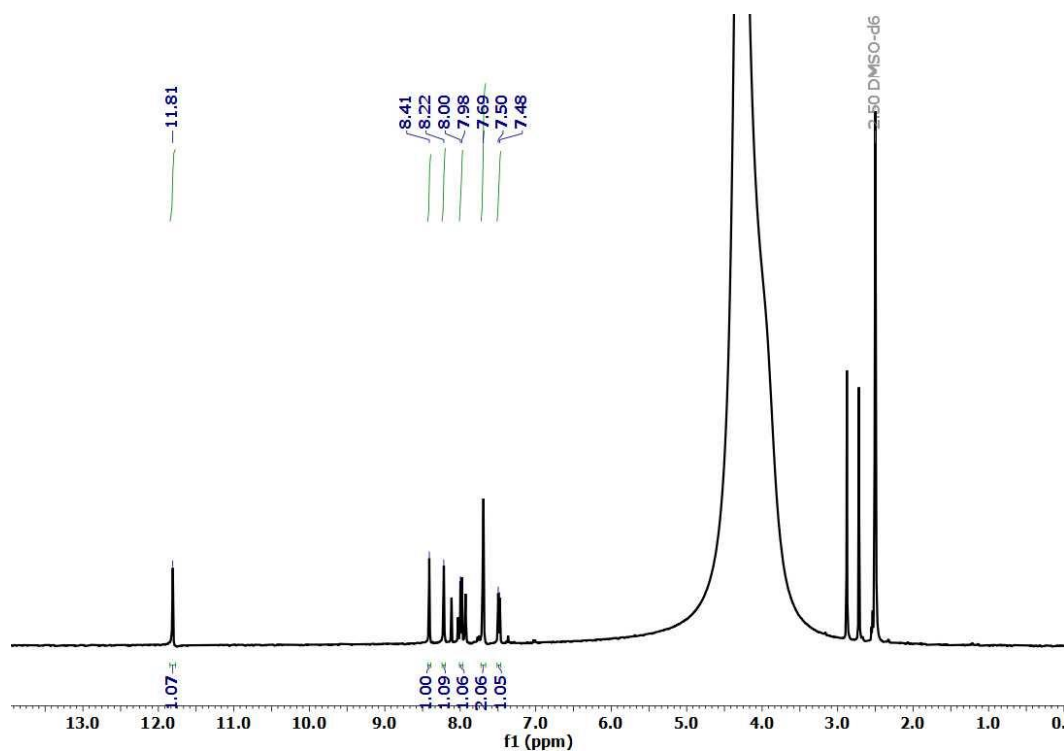

**Figure S10.** <sup>1</sup>H NMR spectrum of digested **1'** (digested using 40 μL of 40% HF in 500 μL of DMSO-d<sub>6</sub>).

**Table S2.** Indexing parameters of UiO-66 and synthesized **1**.

| Compound Name                 | $[\text{Zr}_6\text{O}_4(\text{OH})_4(\text{C}_{12}\text{H}_8\text{N}_4\text{O}_4)_6] \cdot 1.7\text{DMF} \cdot 6.2\text{H}_2\text{O}$ ( <b>1</b> )<br>(this work) | UiO-66<br>(reported) <sup>4</sup> |
|-------------------------------|-------------------------------------------------------------------------------------------------------------------------------------------------------------------|-----------------------------------|
| Crystal System                | Cubic                                                                                                                                                             | Cubic                             |
| $a = b = c$ (Å)               | 20.783 (4)                                                                                                                                                        | 20.7004(2)                        |
| $\alpha = \beta = \gamma$ (°) | 90                                                                                                                                                                | 90                                |
| $V$ (Å <sup>3</sup> )         | 8976.2 (28)                                                                                                                                                       | 8870.3(2)                         |

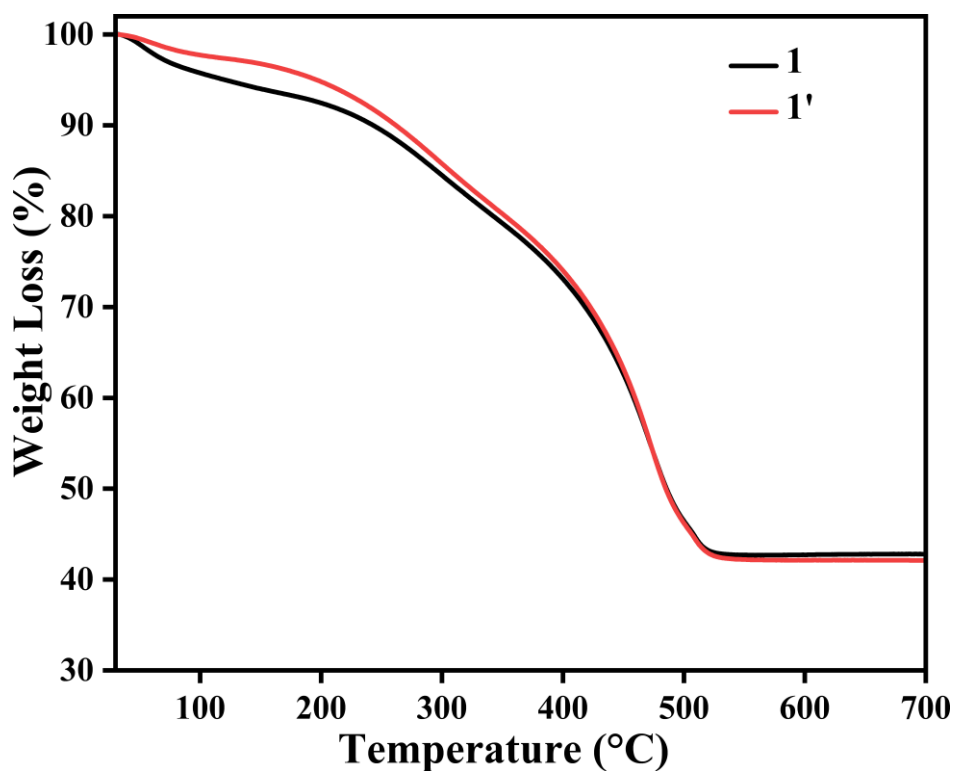

**Figure S11.** TGA curves of **1** and **1'** recorded under O<sub>2</sub> atmosphere in the temperature range of 30-700 °C with a heating rate of 4 °C/min.

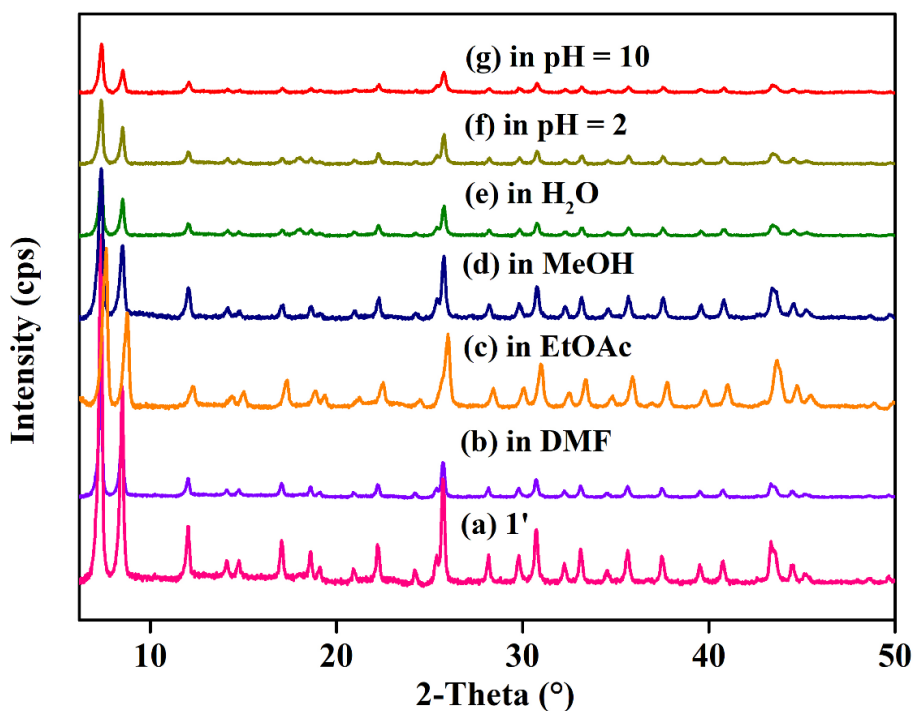

**Figure S12.** PXRD patterns of **1'** and the obtained samples of **1'** after stirring in different media.

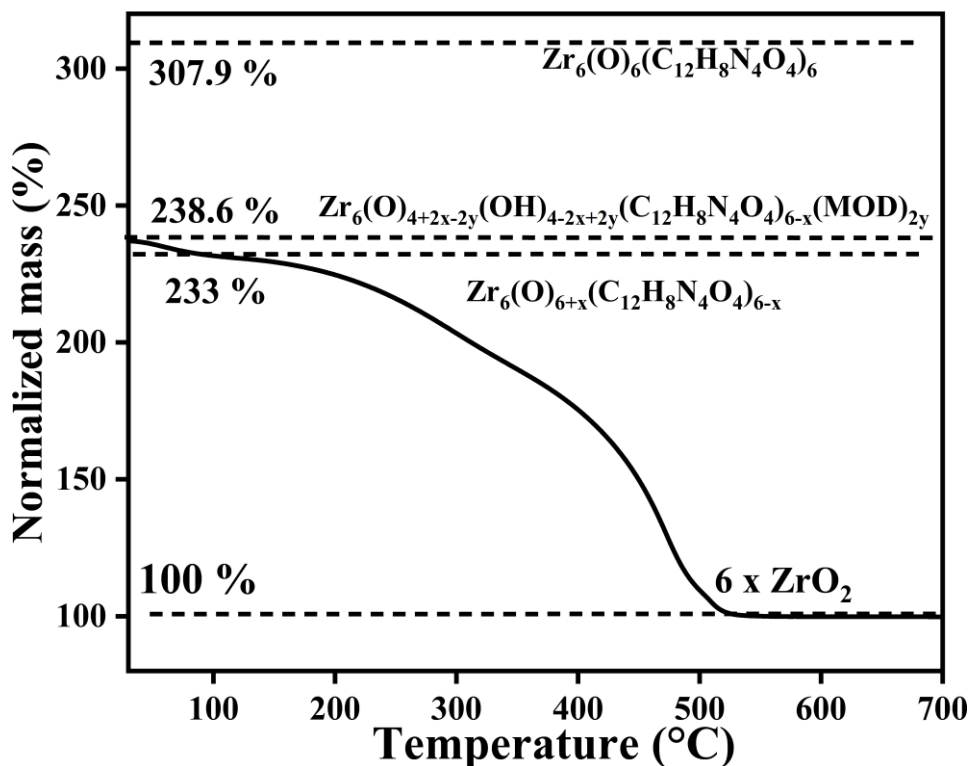

**Figure S13.** Calculation of missing ligand defects from the TG curve of activated **1'**. The vertical dashed line pinpoints  $T_{\text{Plat.}}$ , the temperature at which the plateau ( $W_{\text{Exp. Plat.}}$ ) is reached. The horizontal dashed lines pinpoint the relevant TGA plateaus.

## Calculation of Linker Defects for 1' from TGA Data:

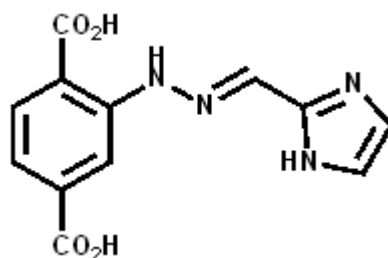

### 2-(2-((1H-imidazol-2-yl)methylene)hydrazineyl)terephthalic acid

Formula of MOF =  $[\text{Zr}_6(\text{O})_4(\text{OH})_4(\text{C}_{12}\text{H}_8\text{N}_4\text{O}_4)_6]$

Molecular weight = 2312.7 g/mol

- ❖ The dehydroxylated and modulator free formula of MOF is  $[\text{Zr}_6(\text{O})_6(\text{C}_{12}\text{H}_8\text{N}_4\text{O}_4)_6]$  (ideal),
- ❖ Molecular Weight = 2276.6 g/mol
- ❖ The dehydroxylated and modulator free formula of MOF is  $[\text{Zr}_6(\text{O})_{6+x}(\text{C}_{10}\text{H}_{20}\text{BrNO}_6)_{6-x}]$  (experimental), Molecular Weight = 2276.6 g/mol (x = number of linker defect).
- ❖ From TGA data, after final weight loss step, the remaining mass is due to 6 moles of  $\text{ZrO}_2$  i.e.  $6 \times 123.2 = 739.3$  g/mol.
- ❖ The ideal weight of  $[\text{Zr}_6(\text{O})_6(\text{C}_{12}\text{H}_8\text{N}_4\text{O}_4)_6]$  is 3.08 times of 6 moles of  $\text{ZrO}_2$ .
- ❖ The remaining flat mass obtained at the last mass on TGA curve was normalized to 100%.
- ❖ The ideal normalized mass percentage for  $[\text{Zr}_6(\text{O})_6(\text{C}_{10}\text{H}_{20}\text{BrNO}_6)_6]$  is 308 %.
- ❖ The experimental normalized mass percentage of  $[\text{Zr}_6(\text{O})_{6+x}(\text{C}_{10}\text{H}_{20}\text{BrNO}_6)_{6-x}]$  from TGA is 233.06%.
- ❖  $x = 6 - (\text{W}_{\text{wt. Plat}} - \text{W}_{\text{end}}/\text{Wt.PL.Theo})$ .

where

- ❖  $\text{W}_{\text{wt. Plat}}$  is the (normalized) weight of the sample at the second TGA plateau.
- ❖  $\text{W}_{\text{end}}$  is 100 %
- ❖  $\text{Wt.PL.Theo} = (\text{W}_{\text{wt. ideal Plat.}} - \text{W}_{\text{end}})/\text{NL}_{\text{ideal}}$
- ❖  $\text{NL}_{\text{ideal}}$  = number of linkers per unit formula ideally (6)
- ❖  $\text{Wt.PL.Theo} = ((308-100)/6) = 34.7$  %
- ❖  $x = 6 - ((233.06 - 100)/34.7) = 6 - 3.84 = 2.16$
- ❖ Number of linker defect per unit formula is 2.

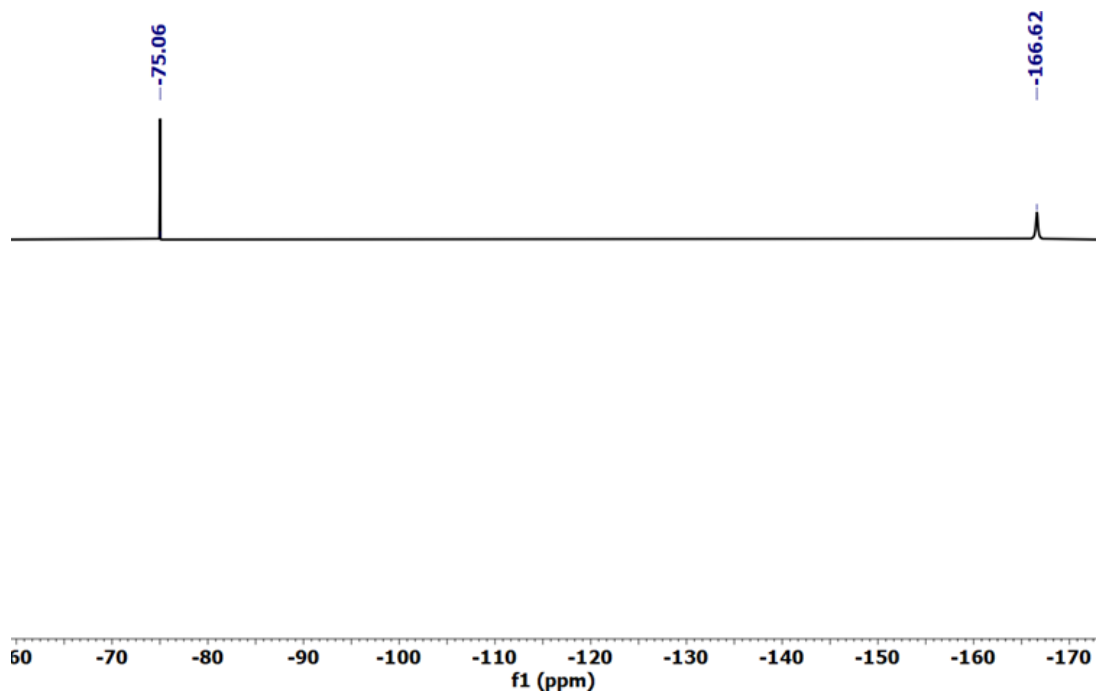

**Figure S14.**  $^{19}\text{F}$  NMR spectrum of digested **1'** in DMSO- $d_6$  with 40% HF.

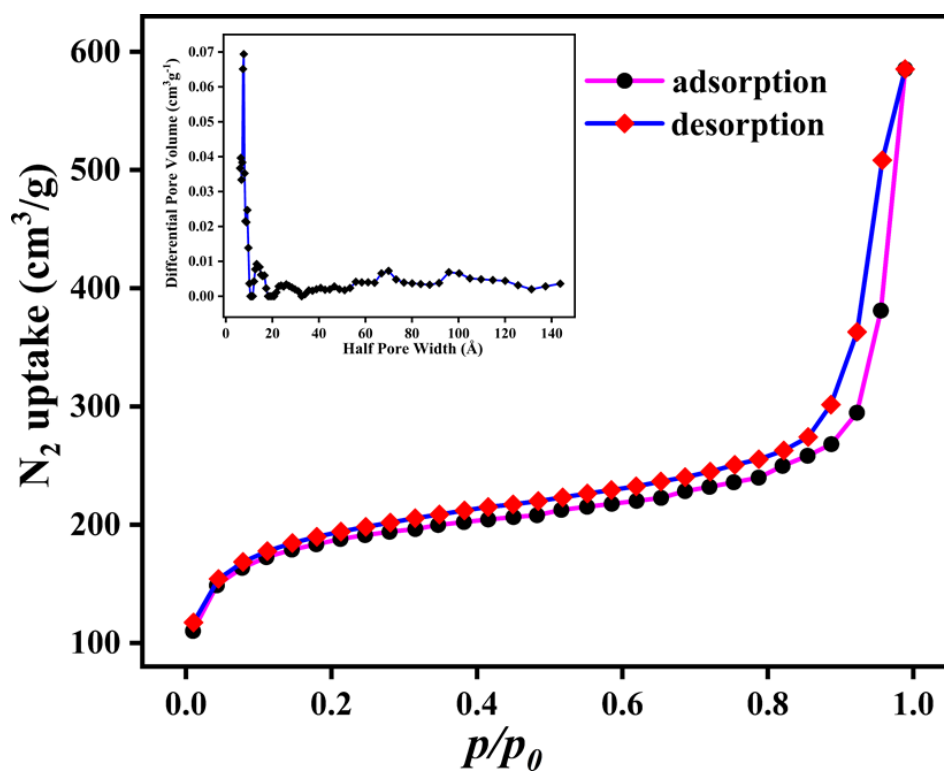

**Figure S15.**  $\text{N}_2$  sorption isotherms of **1'** measured at  $-196$   $^\circ\text{C}$  and density functional theory pore-size distribution of compound **1'** (shown in inset).

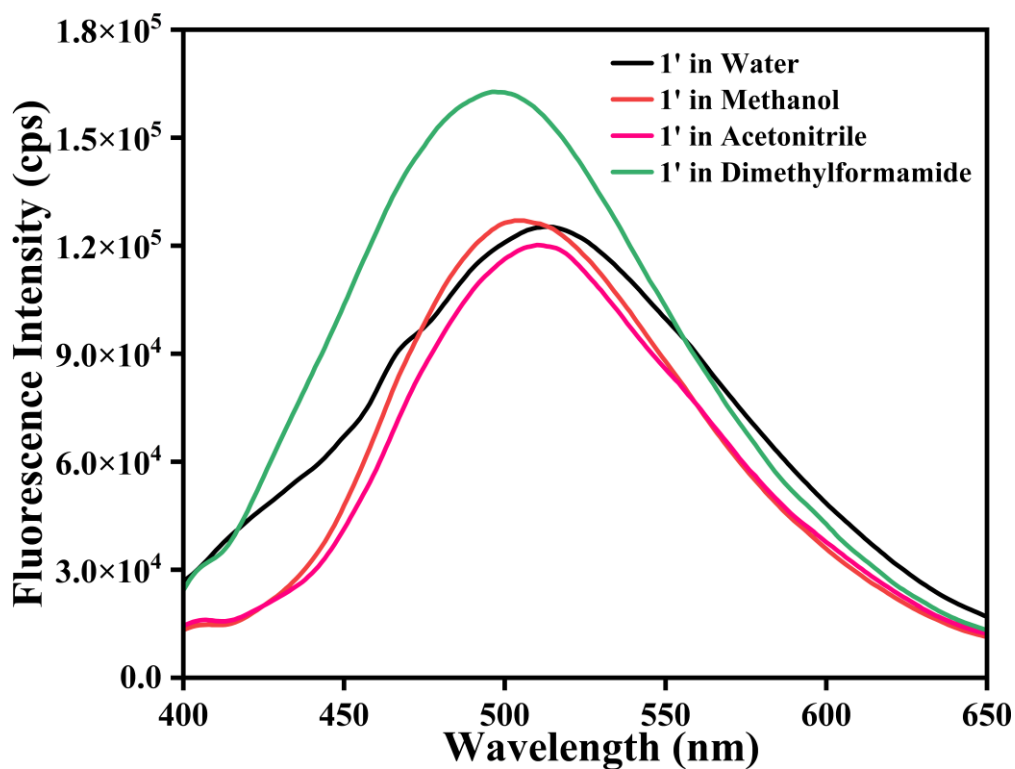

**Figure S16.** Fluorescence emission spectra of **1'** in different solvent media (H<sub>2</sub>O, MeOH, acetonitrile and DMF).

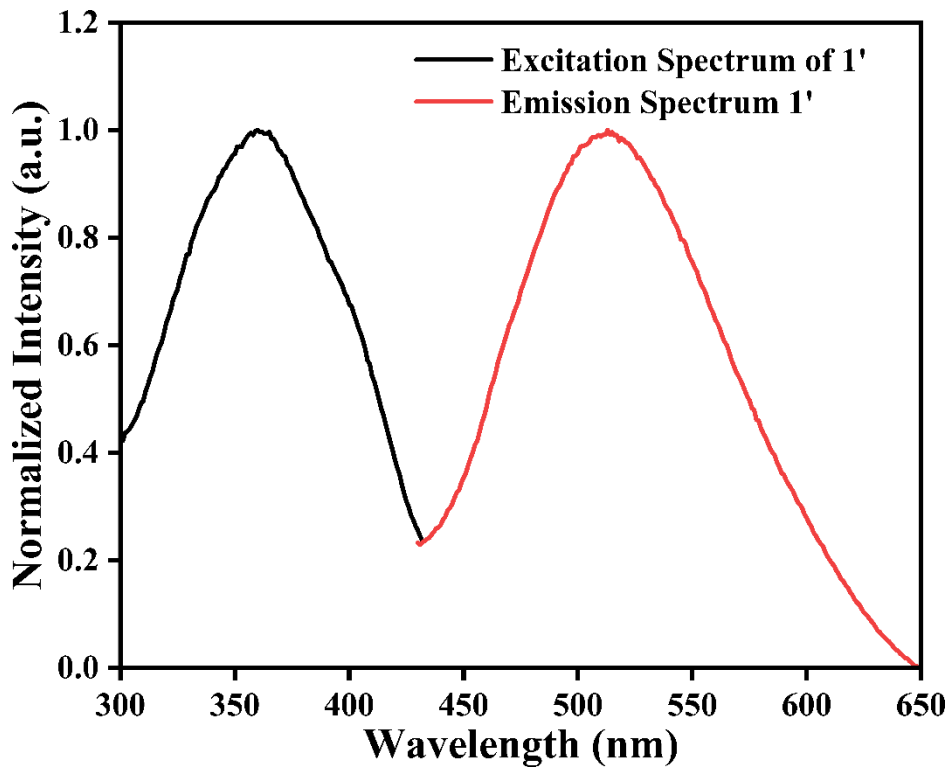

**Figure S17.** Fluorescence excitation and emission spectra of **1'** in water.

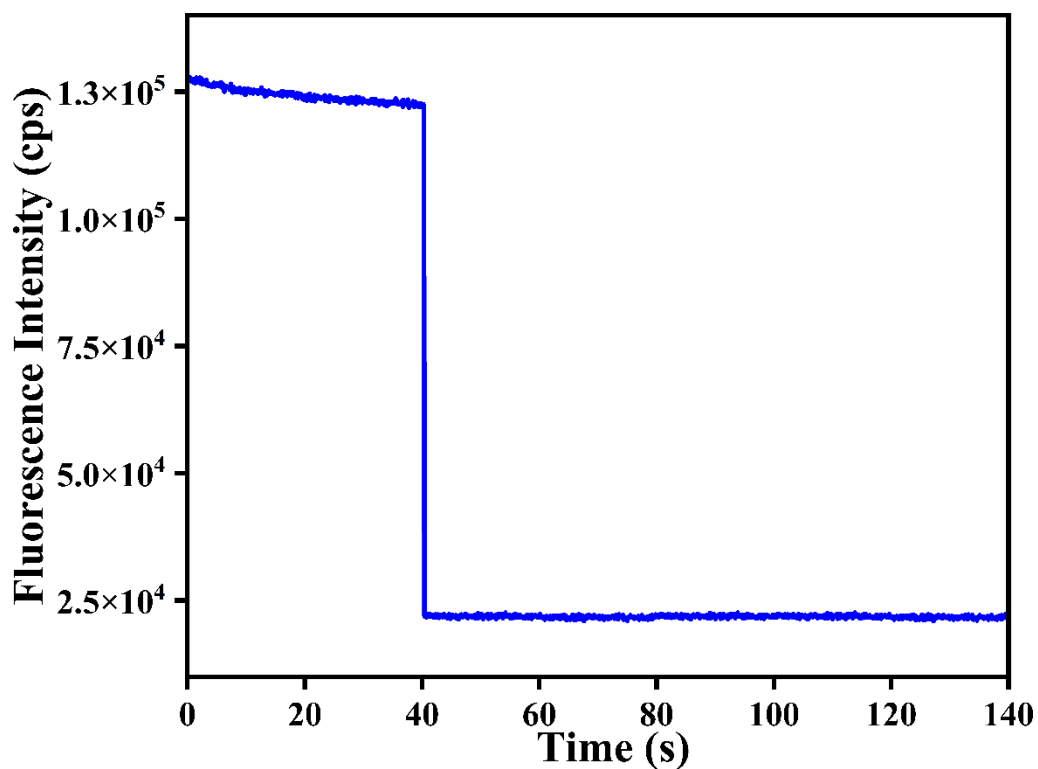

**Figure S18.** Fluorescence kinetic experiment for DNOC sensing.

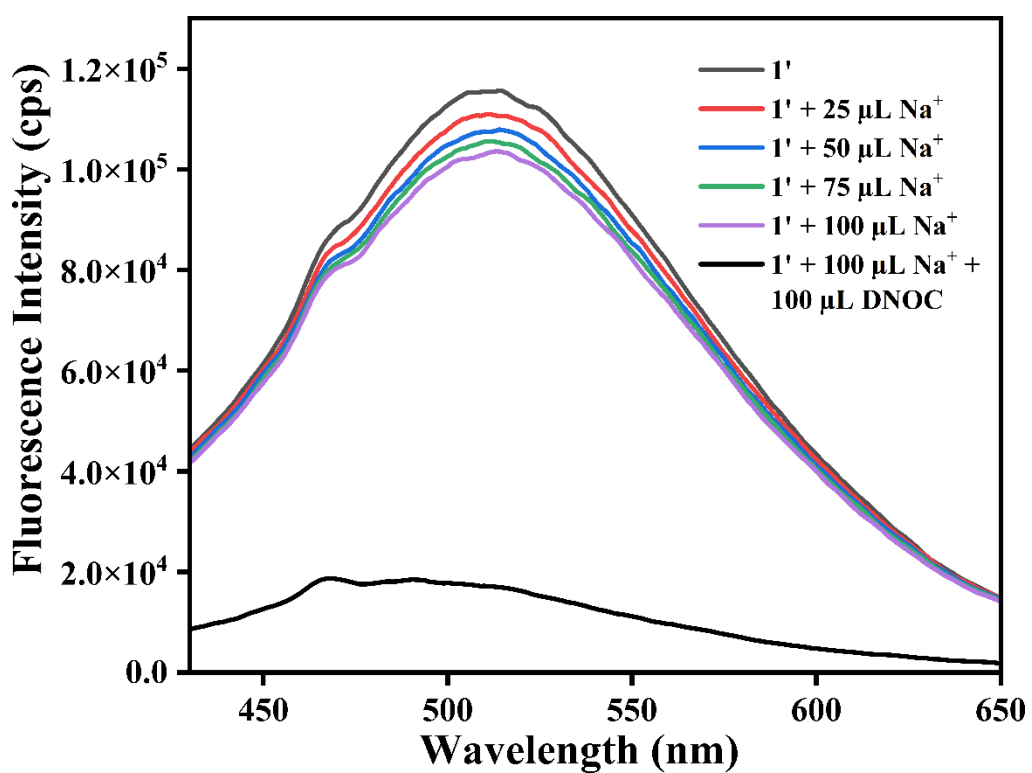

**Figure S19.** Fluorometric turn-off response of **1'** towards DNOC (100  $\mu\text{L}$ , 5 mM) in the presence of  $\text{Na}^+$  (100  $\mu\text{L}$ , 5 mM).

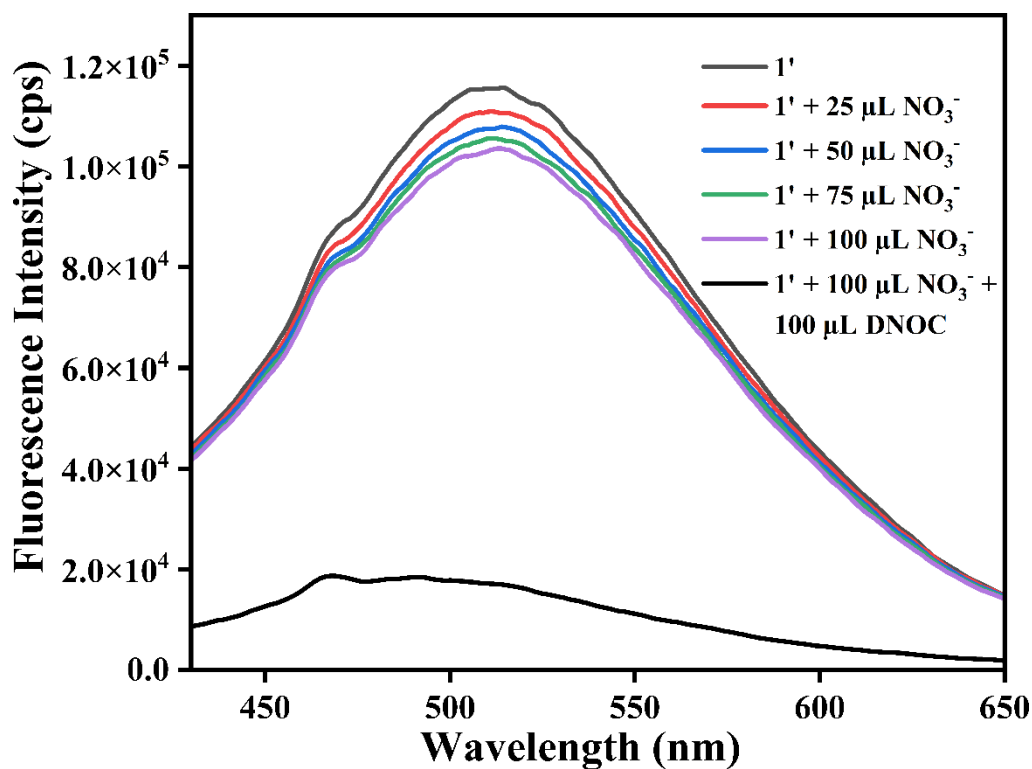

**Figure S20.** Fluorometric turn-off response of 1' towards DNOC (100  $\mu\text{L}$ , 5 mM) in the presence of  $\text{NO}_3^-$  (100  $\mu\text{L}$ , 5 mM).

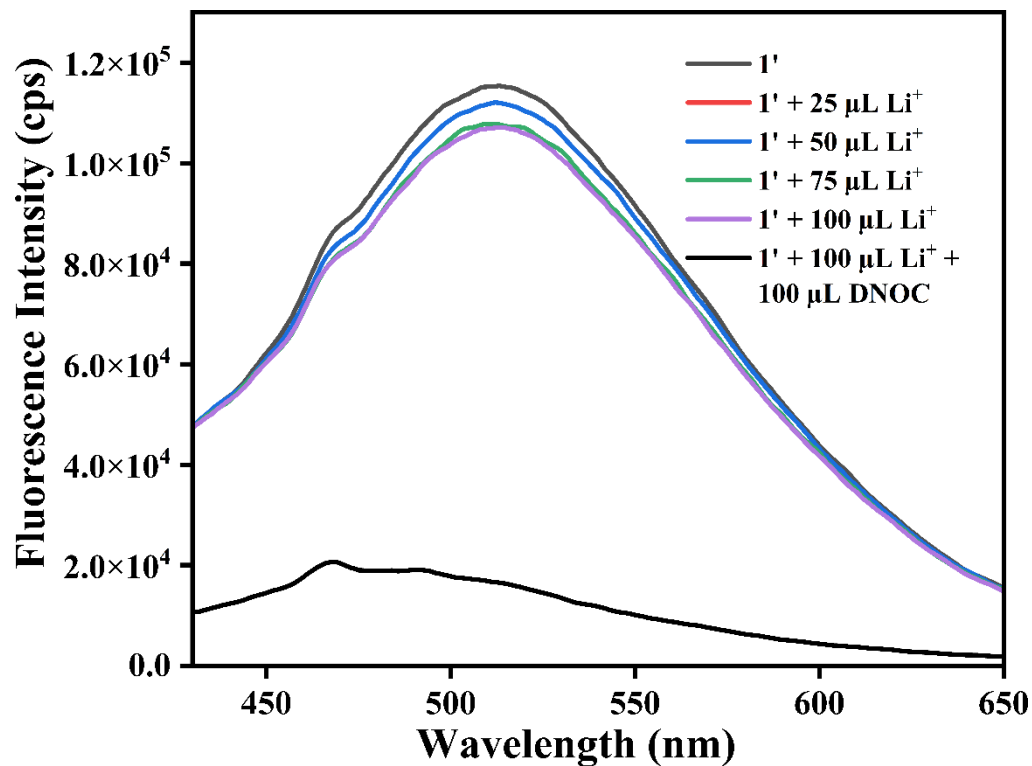

**Figure S21.** Fluorometric turn-off response of 1' towards DNOC (100  $\mu\text{L}$ , 5 mM) in the presence of  $\text{Li}^+$  (100  $\mu\text{L}$ , 5 mM).



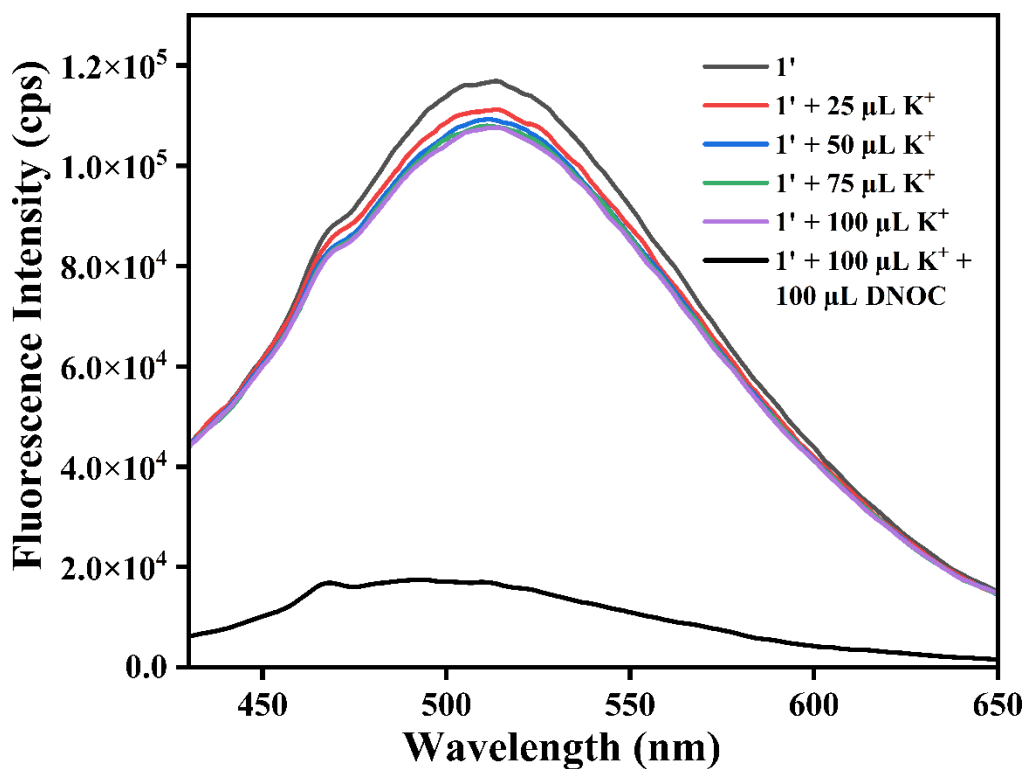

**Figure S22.** Fluorometric turn-off response of 1' towards DNOC (100  $\mu\text{L}$ , 5 mM) in the presence of  $\text{K}^+$  (100  $\mu\text{L}$ , 5 mM).

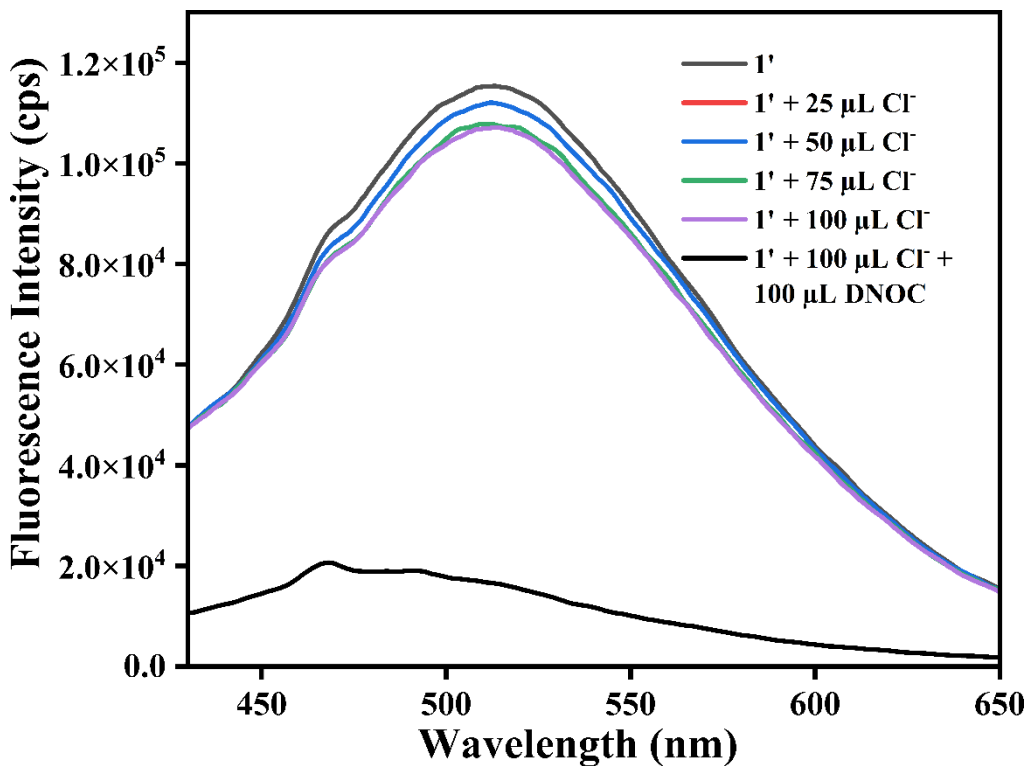

**Figure S23.** Fluorometric turn-off response of 1' towards DNOC (100  $\mu\text{L}$ , 5 mM) in the presence of  $\text{Cl}^-$  (100  $\mu\text{L}$ , 5 mM).

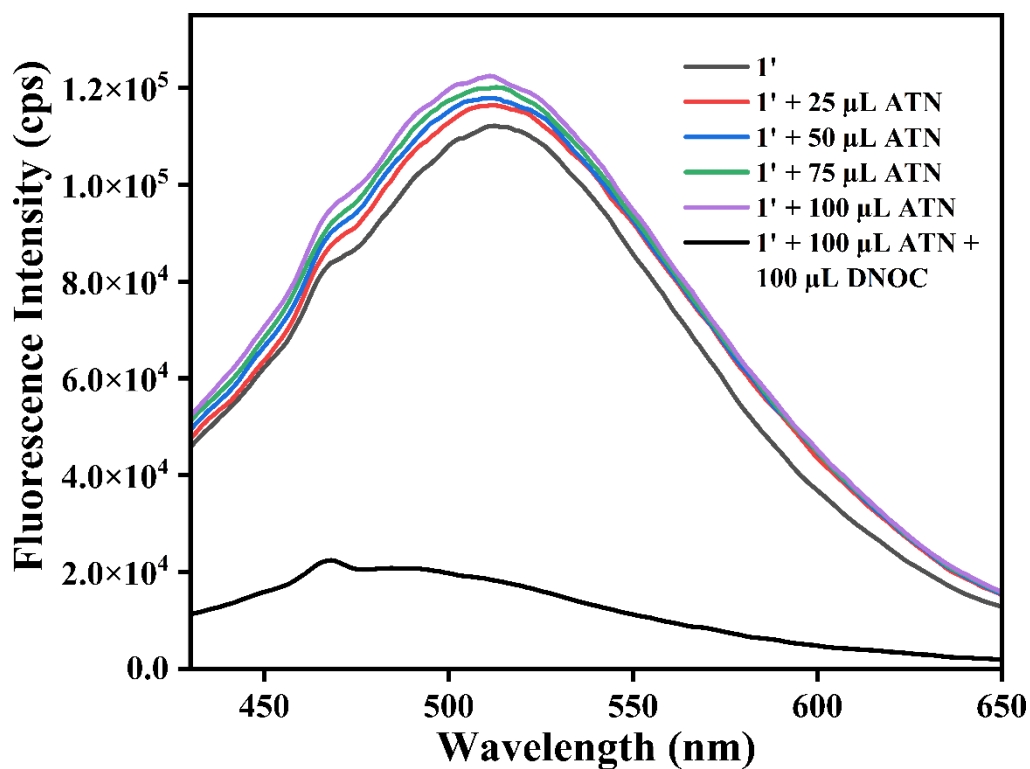

**Figure S24.** Fluorometric turn-off response of 1' towards DNOC (100  $\mu\text{L}$ , 5 mM) in the presence of atrazine (ATN) (100  $\mu\text{L}$ , 5 mM).

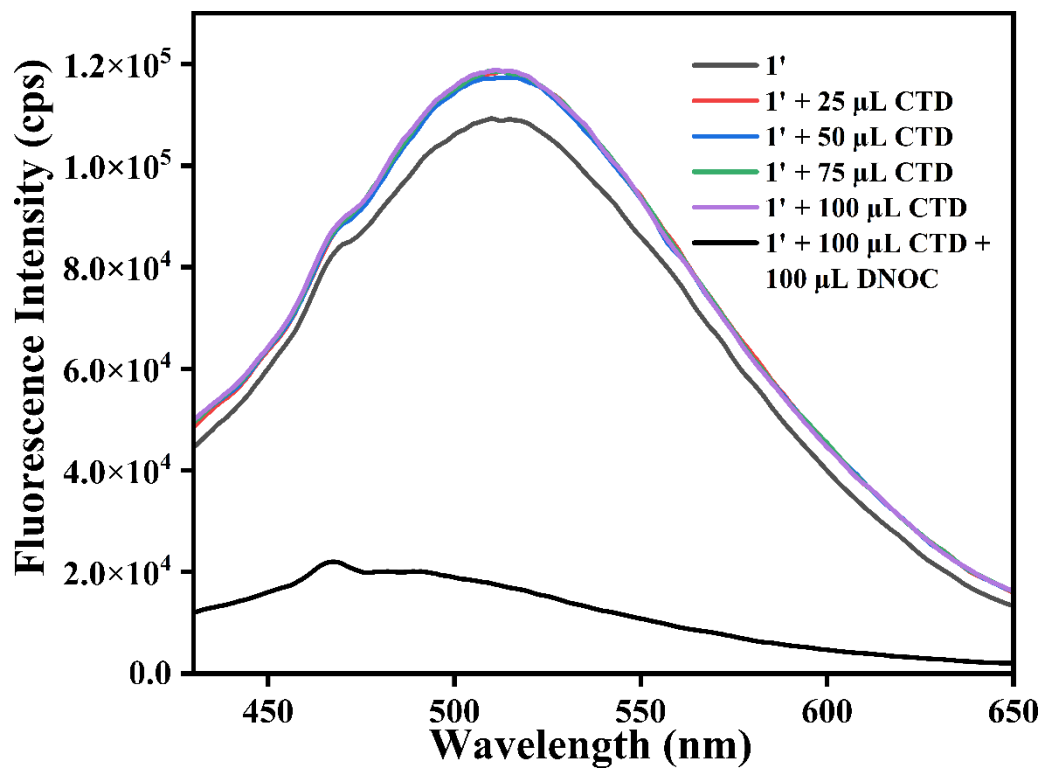

**Figure S25.** Fluorometric turn-off response of 1' towards DNOC (100  $\mu\text{L}$ , 5 mM) in the presence of clothianidin (CTD) (100  $\mu\text{L}$ , 5 mM).

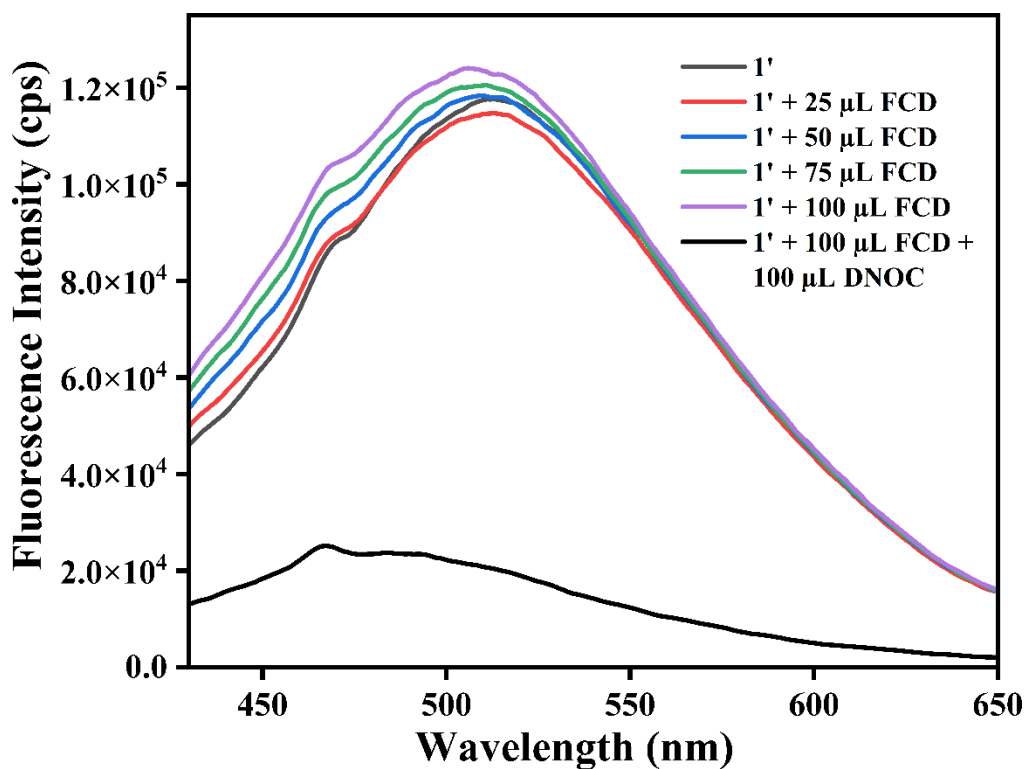

**Figure S26.** Fluorometric turn-off response of **1'** towards DNOC (100  $\mu\text{L}$ , 5 mM) in the presence of flonicamid (FCD) (100  $\mu\text{L}$ , 5 mM).

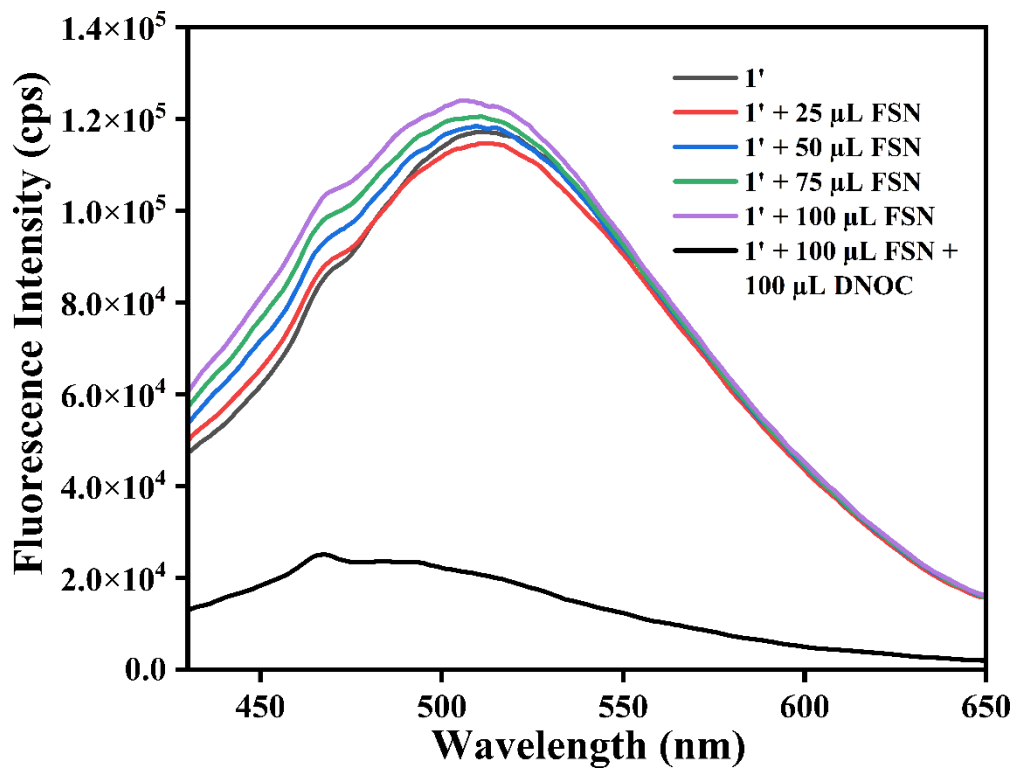

**Figure S27.** Fluorometric turn-off response of **1'** towards DNOC (100  $\mu\text{L}$ , 5 mM) in the presence of fomesafen, (FSN) (100  $\mu\text{L}$ , 5 mM).

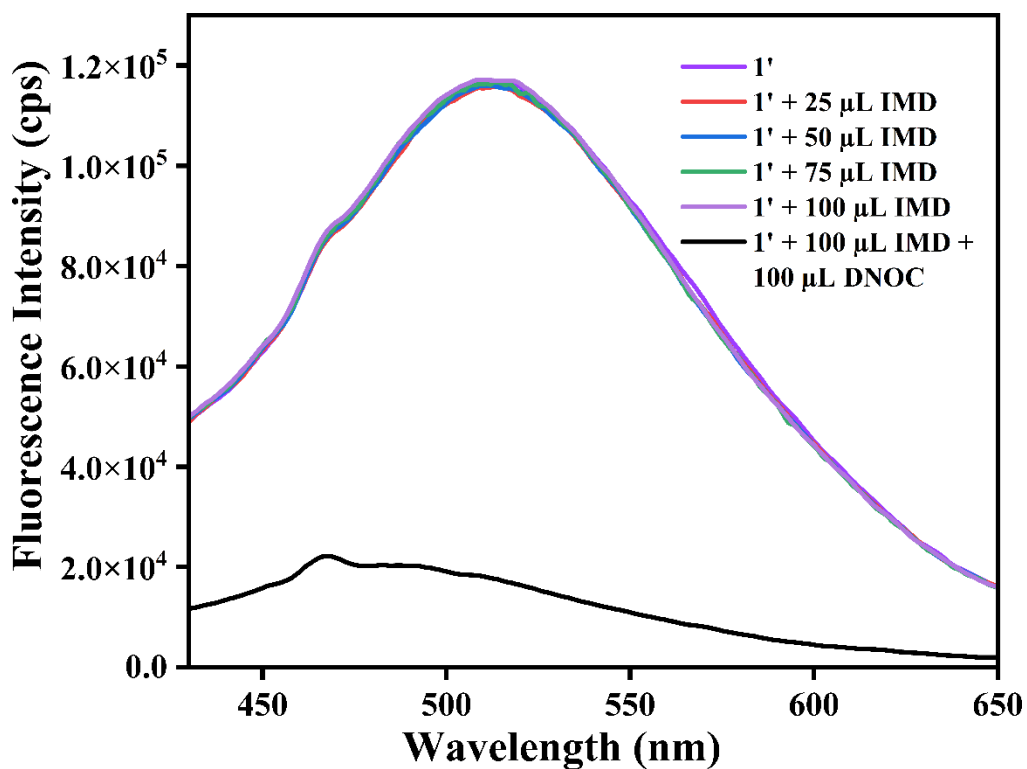

**Figure S28.** Fluorometric turn-off response of **1'** towards DNOC (100  $\mu\text{L}$ , 5 mM) in the presence of imidacloprid (IMD) (100  $\mu\text{L}$ , 5 mM).

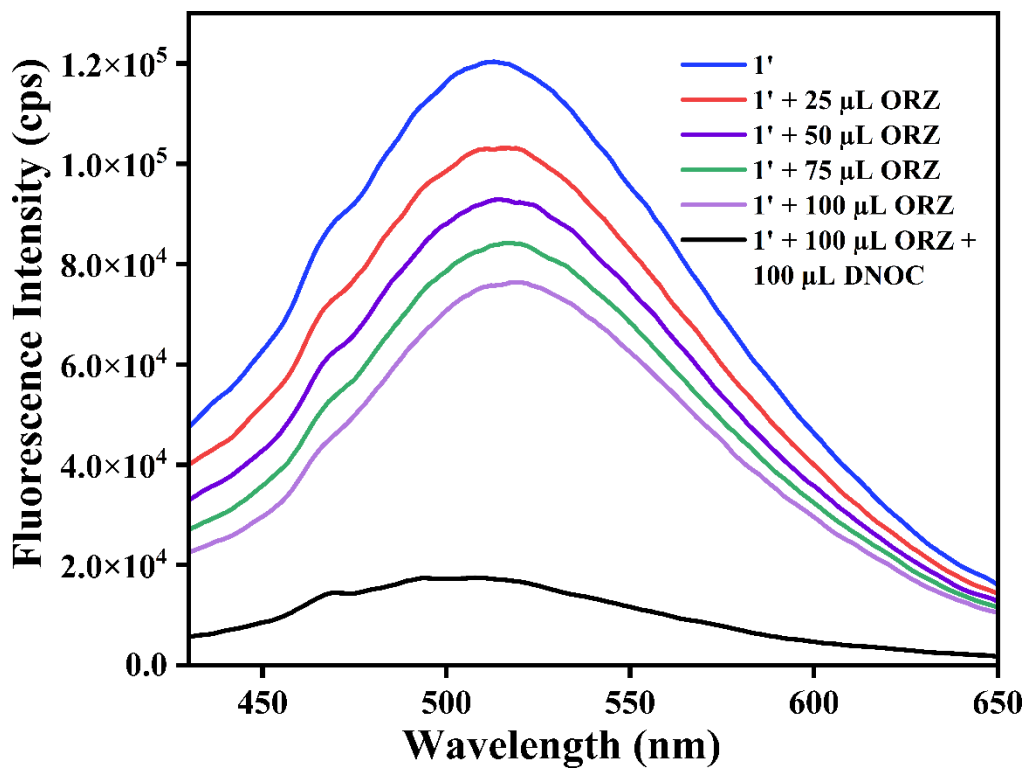

**Figure S29.** Fluorometric turn-off response of **1'** towards DNOC (100  $\mu\text{L}$ , 5 mM) in the presence of oryzalin (ORZ) (100  $\mu\text{L}$ , 5 mM).

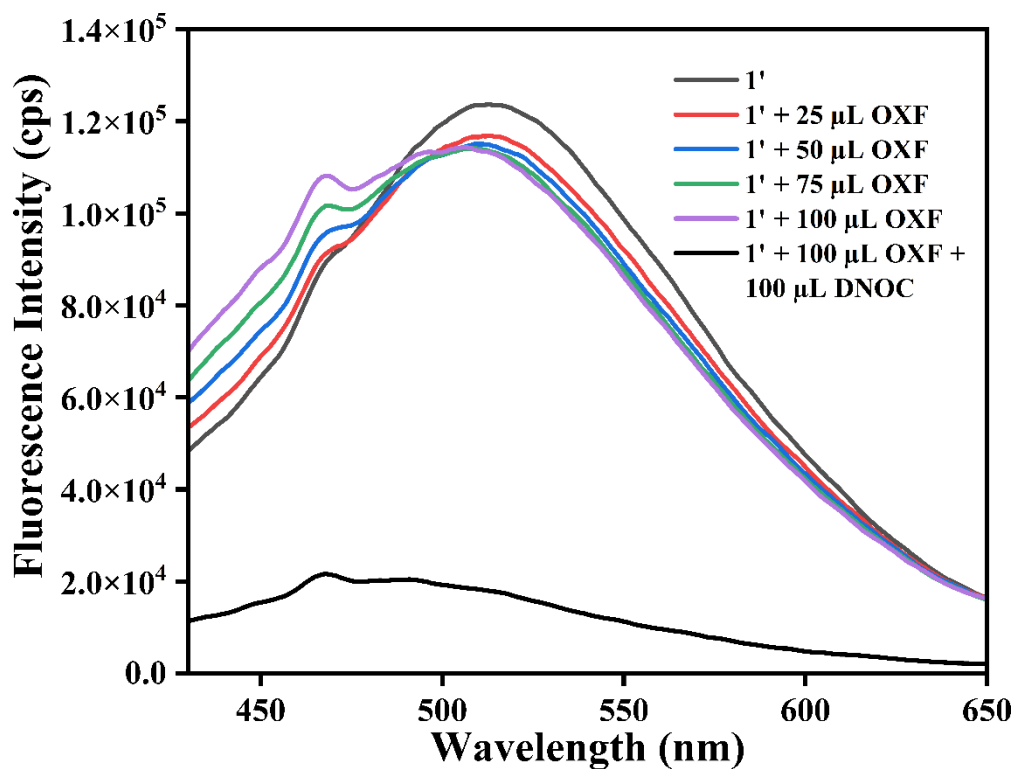

**Figure S30.** Fluorometric turn-off response of **1'** towards DNOC (100  $\mu$ L, 5 mM) in the presence of oxyfluorfen (OXF) (100  $\mu$ L, 5 mM).

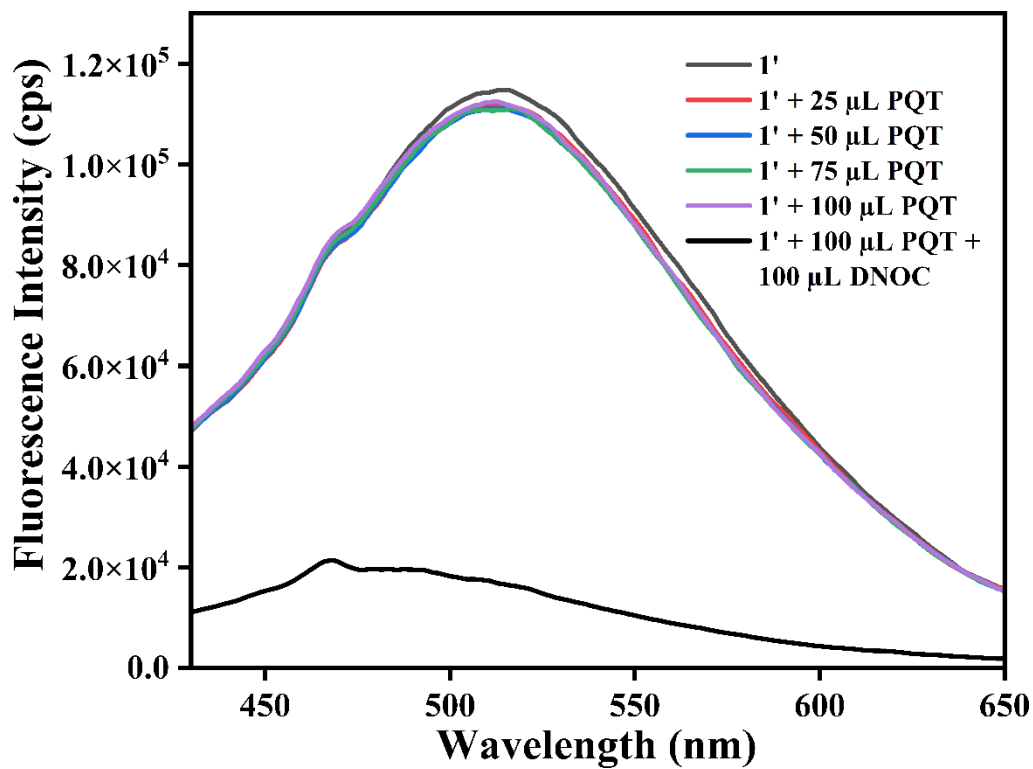

**Figure S31.** Fluorometric turn-off response of **1'** towards DNOC (100  $\mu$ L, 5 mM) in the presence of paraquat, (PQT) (100  $\mu$ L, 5 mM).

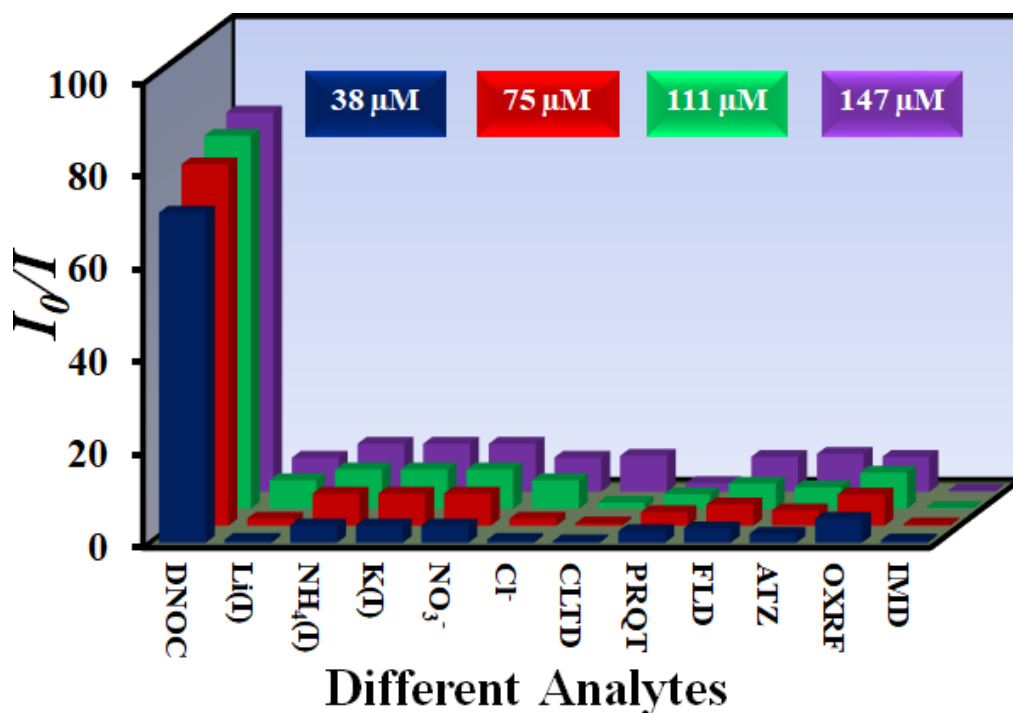

**Figure S32.** 3-D Stern-Volmer plots for DNOC sensing.

**Table S3.** Evaluation of intra-day, inter-day accuracy and precision study of change in fluorescence intensity of **1'** after incremental addition of 5 mM aqueous solution of DNOC.

| Type of Precision | Amount of DNOC Added ( $\mu\text{L}$ ) | Fluorescence Intensity |          |          | Average PL Intensity (cps) | SD    | Error  | RSD (%) |
|-------------------|----------------------------------------|------------------------|----------|----------|----------------------------|-------|--------|---------|
| <b>Intra Day</b>  | 0                                      | 125829.0               | 125634.8 | 125021.1 | 125495.0                   | 421.7 | -0.003 | -0.3    |
|                   | 25                                     | 21805.2                | 21800.5  | 21711.1  | 21772.2                    | 53.0  | -0.002 | -0.2    |
|                   | 50                                     | 18755.6                | 18522.3  | 18305.5  | 18527.8                    | 225.1 | -0.012 | -1.2    |
|                   | 75                                     | 18205.1                | 18407.1  | 18284.7  | 18298.9                    | 101.7 | 0.005  | 0.5     |
|                   | 100                                    | 18628.1                | 18557.4  | 18071.7  | 18419.1                    | 302.9 | -0.011 | -1.1    |
| <b>Inter Day</b>  | 0                                      | 125021.1               | 125085.2 | 124843.9 | 124983.4                   | 125.0 | 0.000  | 0.0     |
|                   | 25                                     | 21711.1                | 21474.1  | 21395.9  | 21527.0                    | 164.1 | -0.008 | -0.8    |
|                   | 50                                     | 18305.5                | 18159.2  | 18037.1  | 18167.3                    | 134.4 | -0.008 | -0.8    |
|                   | 75                                     | 18284.7                | 18012.6  | 17836.2  | 18044.5                    | 225.9 | -0.013 | -1.3    |
|                   | 100                                    | 18071.7                | 18200.9  | 17865.5  | 18046.0                    | 169.2 | -0.001 | -0.1    |

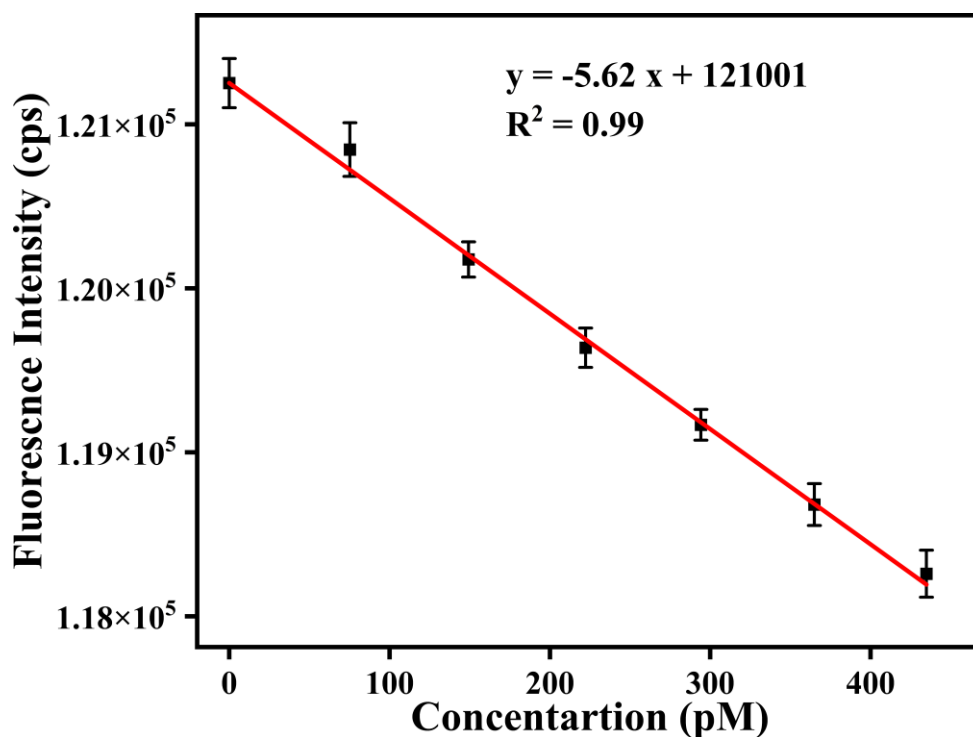

**Figure S33.** Change in the fluorescence intensity of **1'** in water as a function of concentration of DNOC (black colour error bars signify the standard deviations of three individual measurements).

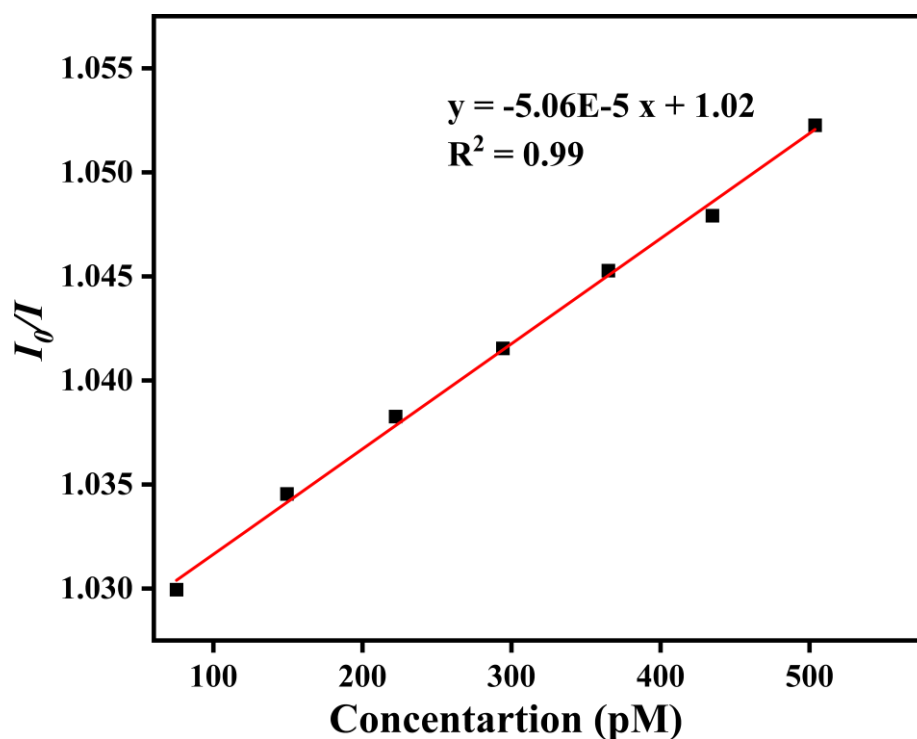

**Figure S34.** Stern-Volmer plot for the fluorescence quenching of **1'** in presence of DNOC in aqueous medium (black colour error bars signify the standard deviations of three individual measurements).

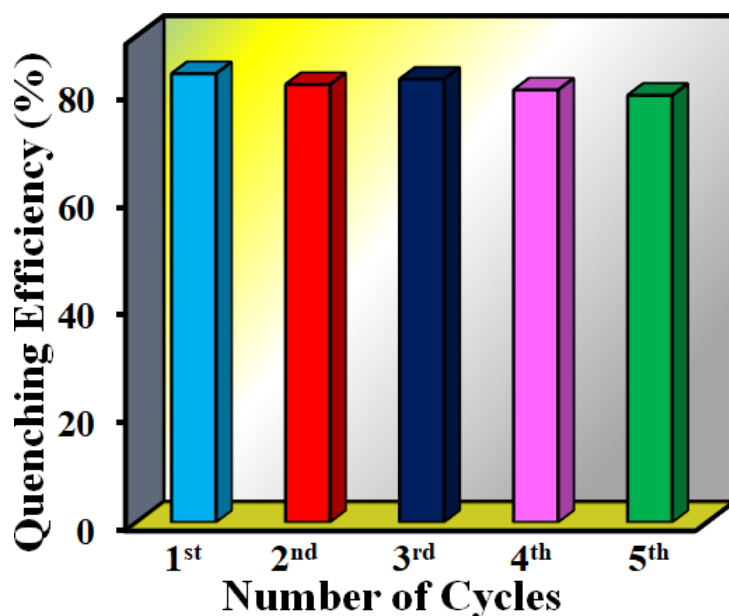

**Figure S35.** Reusability of probe **1'** towards DNOC sensing in aqueous medium.

**Table S4.** Fluorescence lifetimes of **1'** before and after the addition of DNOC solution ( $\lambda_{\text{ex}} = 375$  nm, pulsed diode laser).

| Volume of DNOC Solution Added ( $\mu\text{L}$ ) | $\alpha_1$ | $\tau_1$ (ns) | $\langle \tau \rangle^*$ (ns) | $\chi^2$ |
|-------------------------------------------------|------------|---------------|-------------------------------|----------|
| 0                                               | 1          | 12.5          | 15.20                         | 1.12     |
| 100                                             | 1          | 6.1           | 6.1                           | 0.97     |

$$\langle \tau \rangle^* = \alpha_1 \tau_1$$

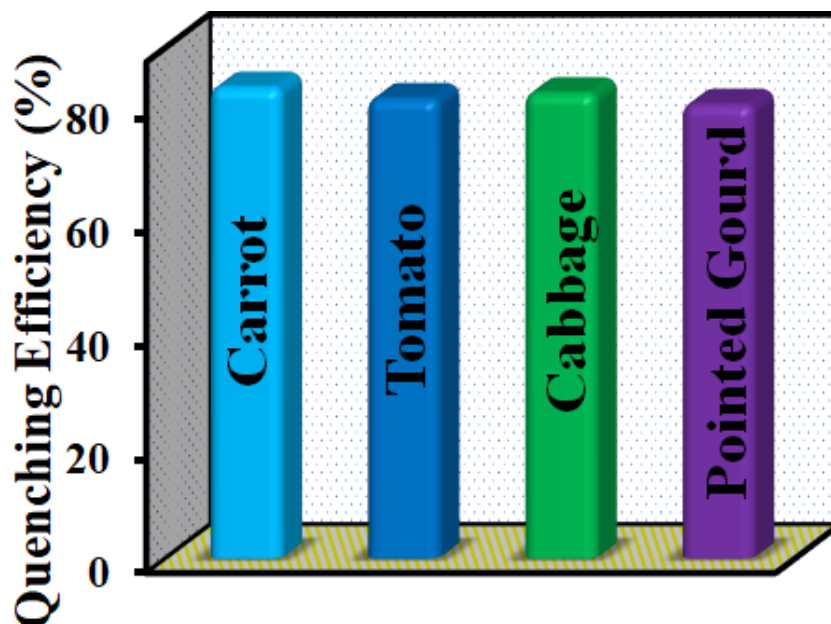

**Figure S36.** Detection of DNOC in different fruits and vegetables extracts using probe **1'**.



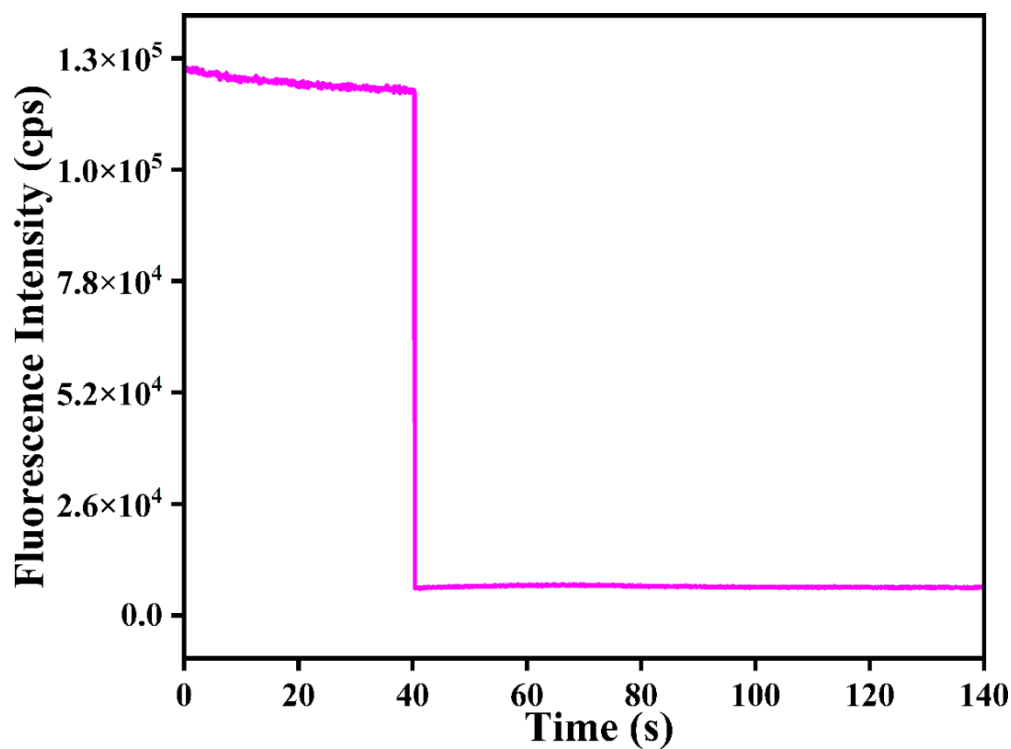

**Figure S37.** Fluorescence kinetic experiment for furaltadone (FLT) sensing.

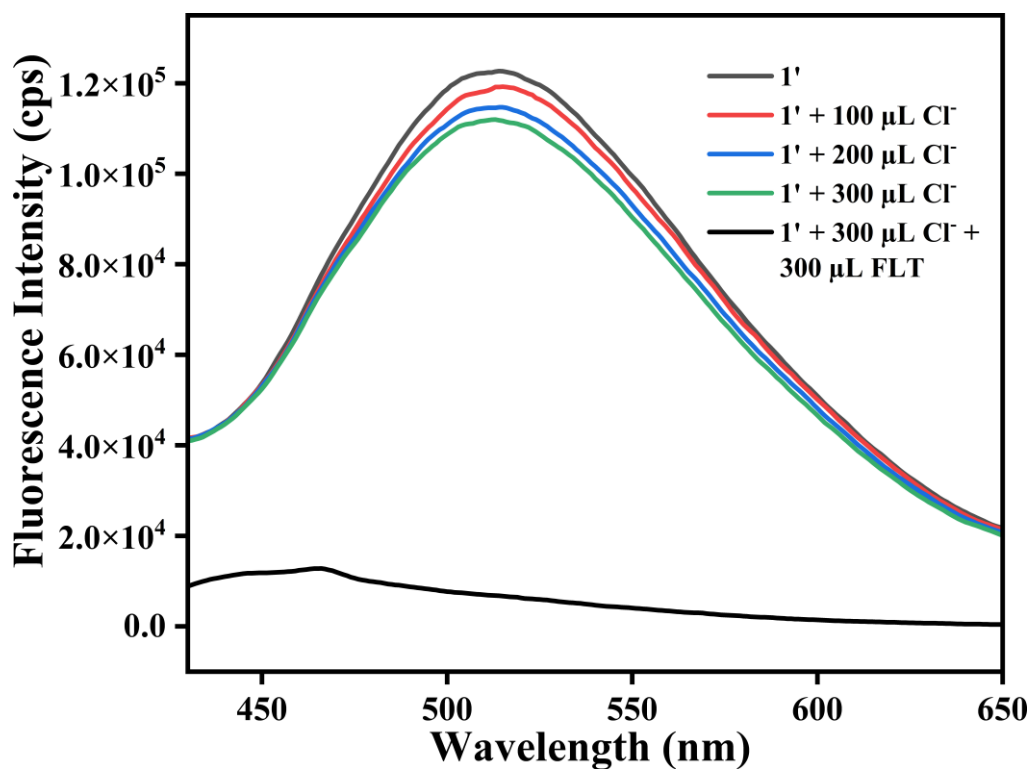

**Figure S38.** Fluorometric turn-off response of **1'** towards furaltadone (FLT) (300  $\mu\text{L}$ , 5 mM) in the presence of  $\text{Cl}^-$  (300  $\mu\text{L}$ , 5 mM).

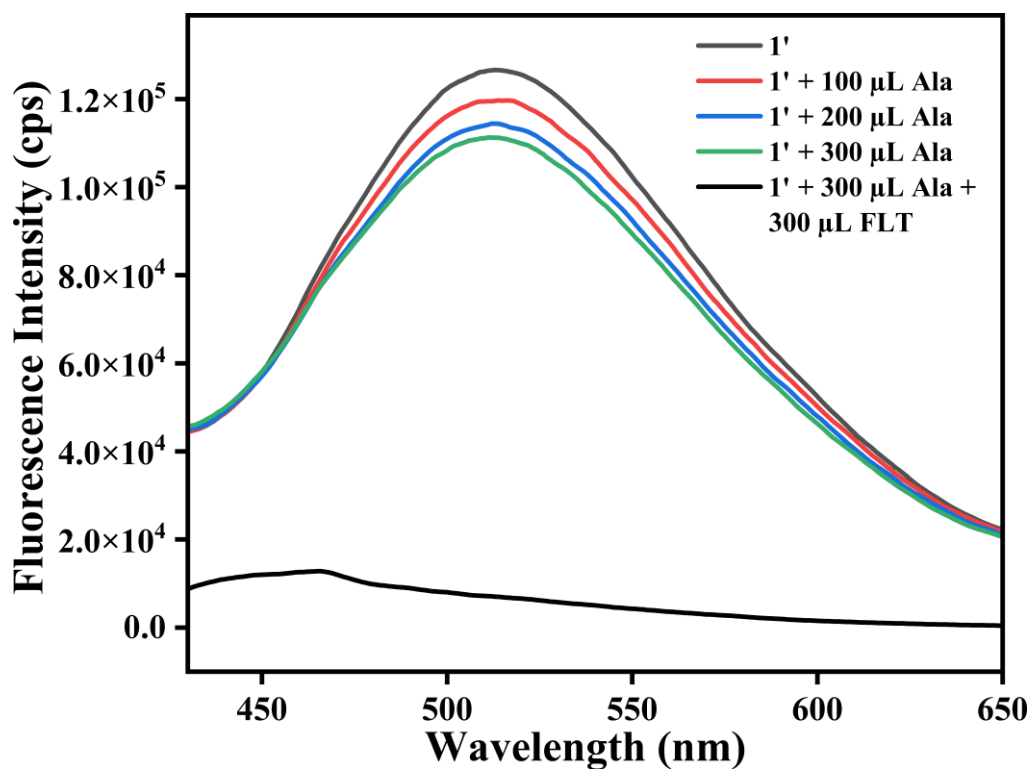

**Figure S39.** Fluorometric turn-off response of **1'** towards furaltadone (FLT) (300  $\mu\text{L}$ , 5 mM) in the presence of alanine (Ala) (300  $\mu\text{L}$ , 5 mM).

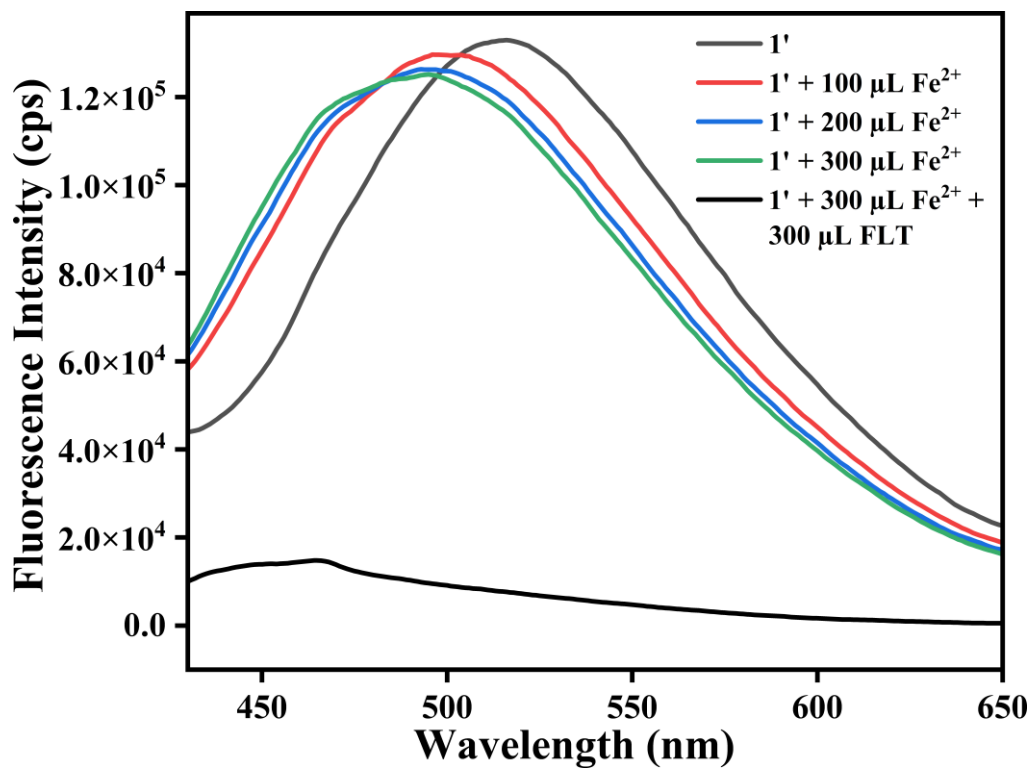

**Figure S40.** Fluorometric turn-off response of **1'** towards furaltadone (FLT) (300  $\mu\text{L}$ , 5 mM) in the presence of  $\text{Fe}^{2+}$  (300  $\mu\text{L}$ , 5 mM).

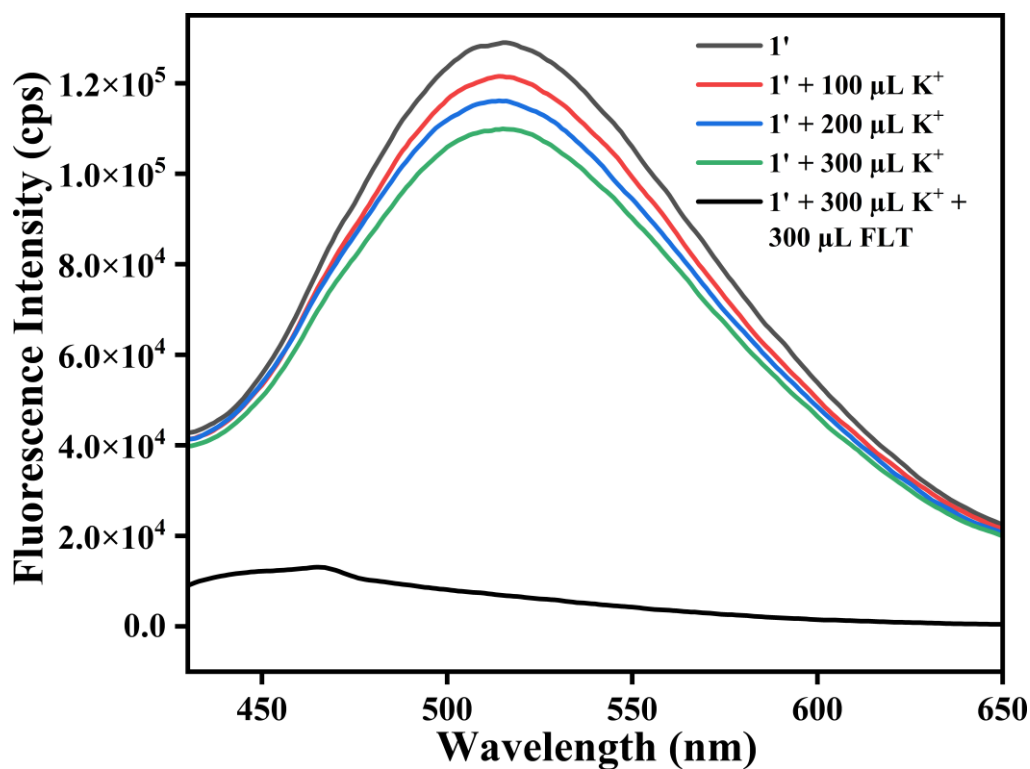

**Figure S41.** Fluorometric turn-off response of **1'** towards furaltadone (FLT) (300  $\mu\text{L}$ , 5 mM) in the presence of  $\text{K}^+$  (300  $\mu\text{L}$ , 5 mM).

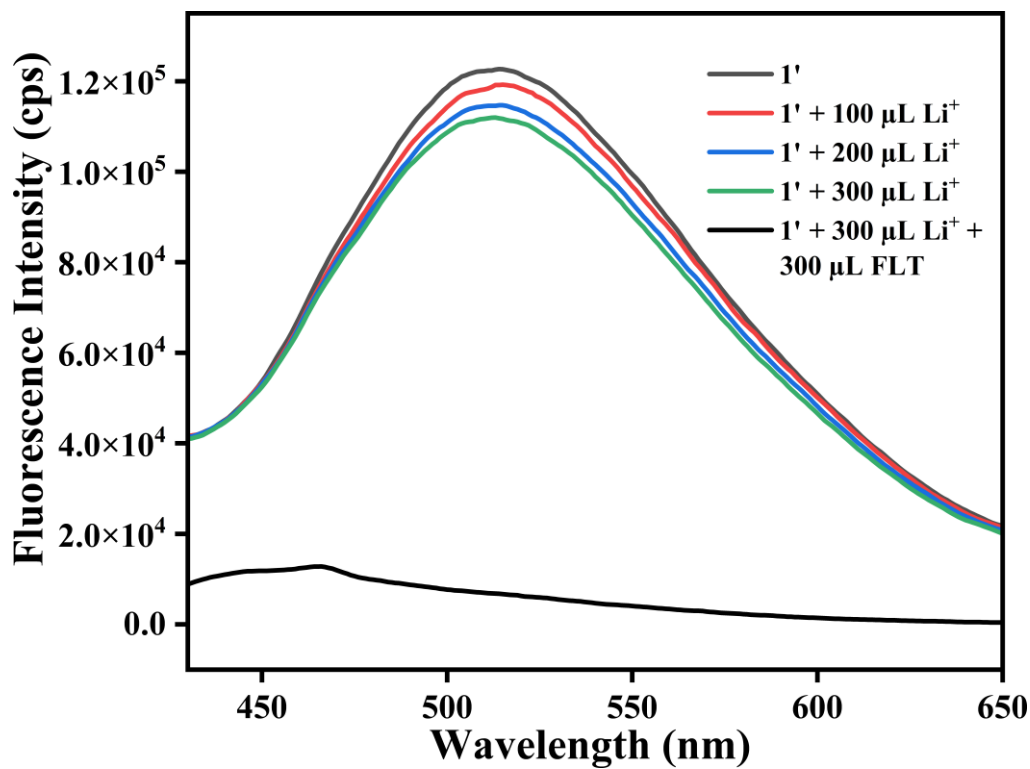

**Figure S42.** Fluorometric turn-off response of **1'** towards furaltadone (FLT) (300  $\mu\text{L}$ , 5 mM) in the presence of  $\text{Li}^+$  (300  $\mu\text{L}$ , 5 mM).

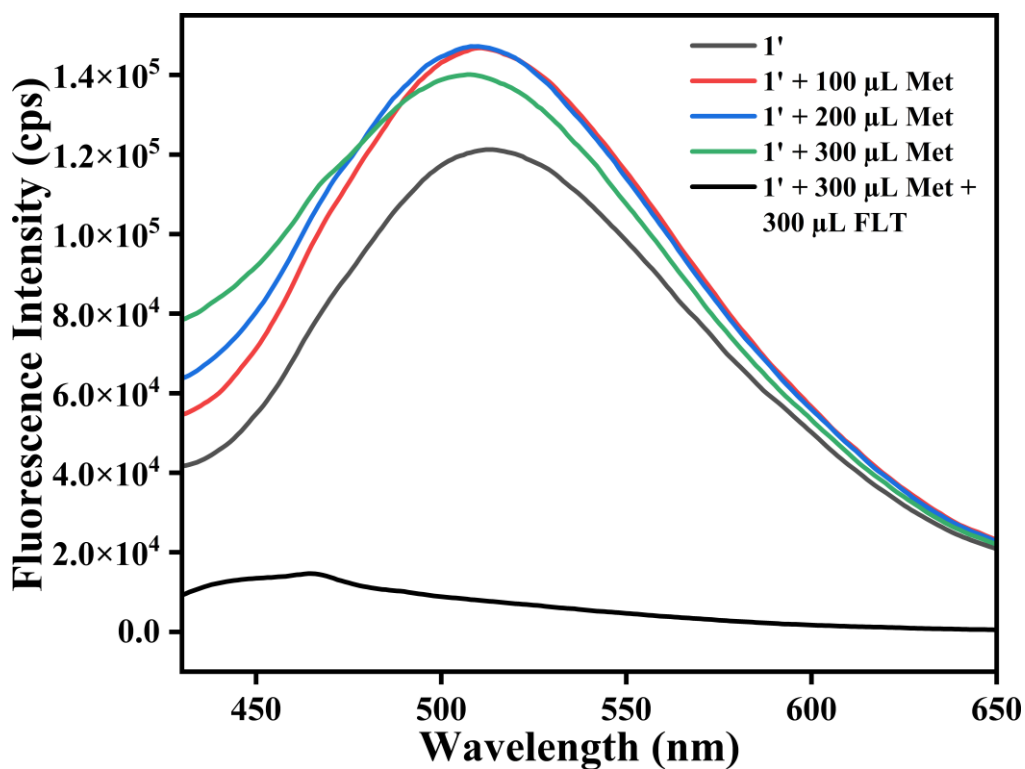

**Figure S43.** Fluorometric turn-off response of **1'** towards furaltadone (FLT) (300  $\mu\text{L}$ , 5 mM) in the presence of methionine (Met) (300  $\mu\text{L}$ , 5 mM).

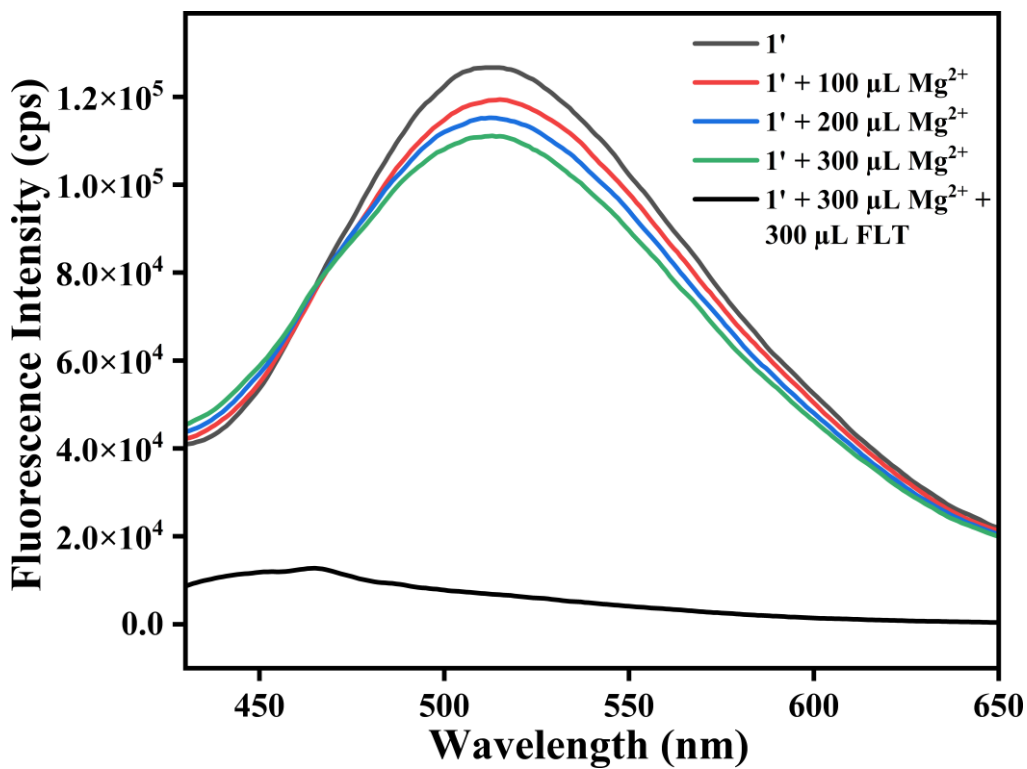

**Figure S44.** Fluorometric turn-off response of **1'** towards furaltadone (FLT) (300  $\mu\text{L}$ , 5 mM) in the presence of  $\text{Mg}^{2+}$  (300  $\mu\text{L}$ , 5 mM).

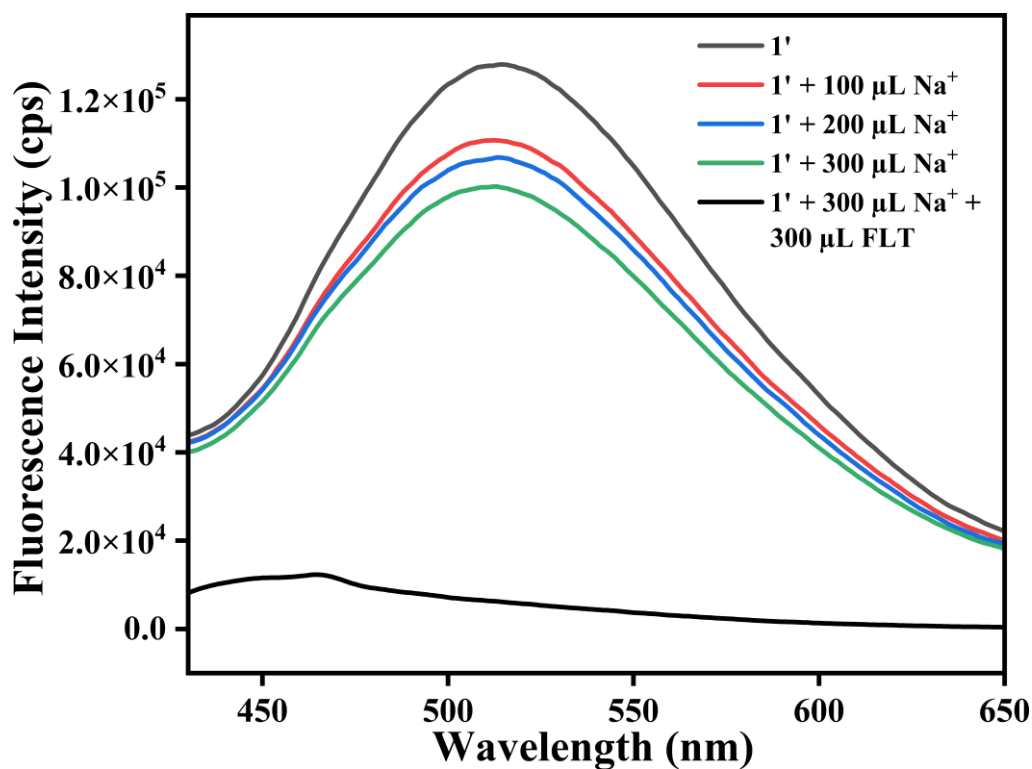

**Figure S45.** Fluorometric turn-off response of **1'** towards furaltadone (FLT) (300  $\mu\text{L}$ , 5 mM) in the presence of  $\text{Na}^+$  (300  $\mu\text{L}$ , 5 mM).

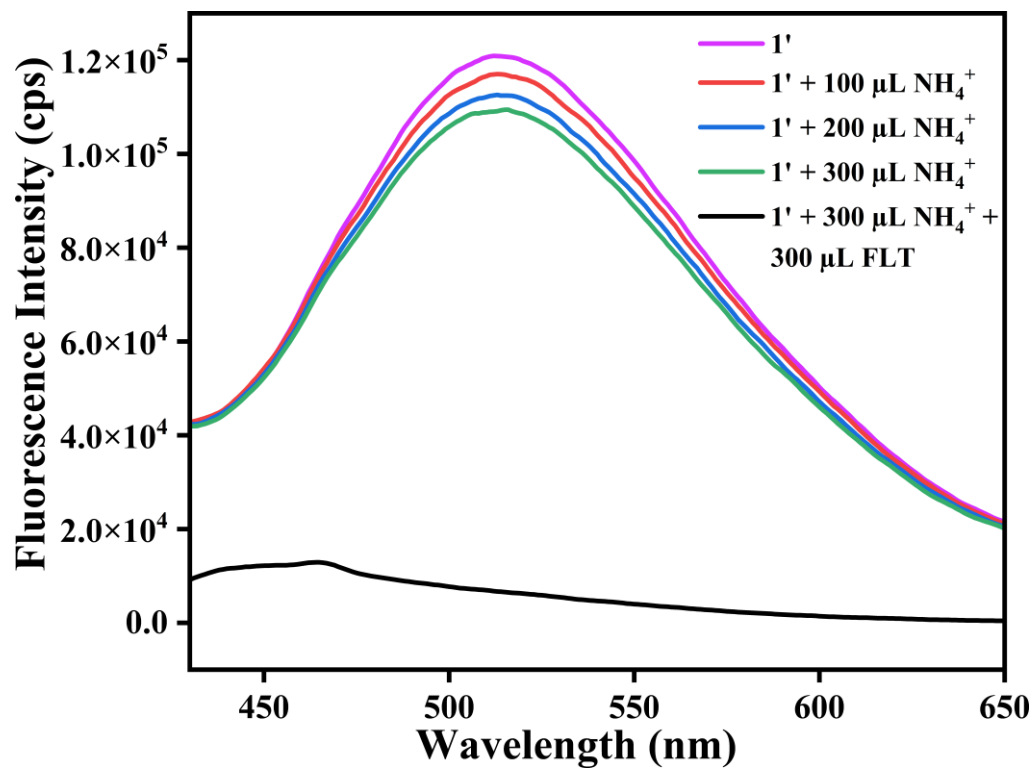

**Figure S46.** Fluorometric turn-off response of **1'** towards furaltadone (FLT) (300  $\mu\text{L}$ , 5 mM) in the presence of  $\text{NH}_4^+$  (300  $\mu\text{L}$ , 5 mM).

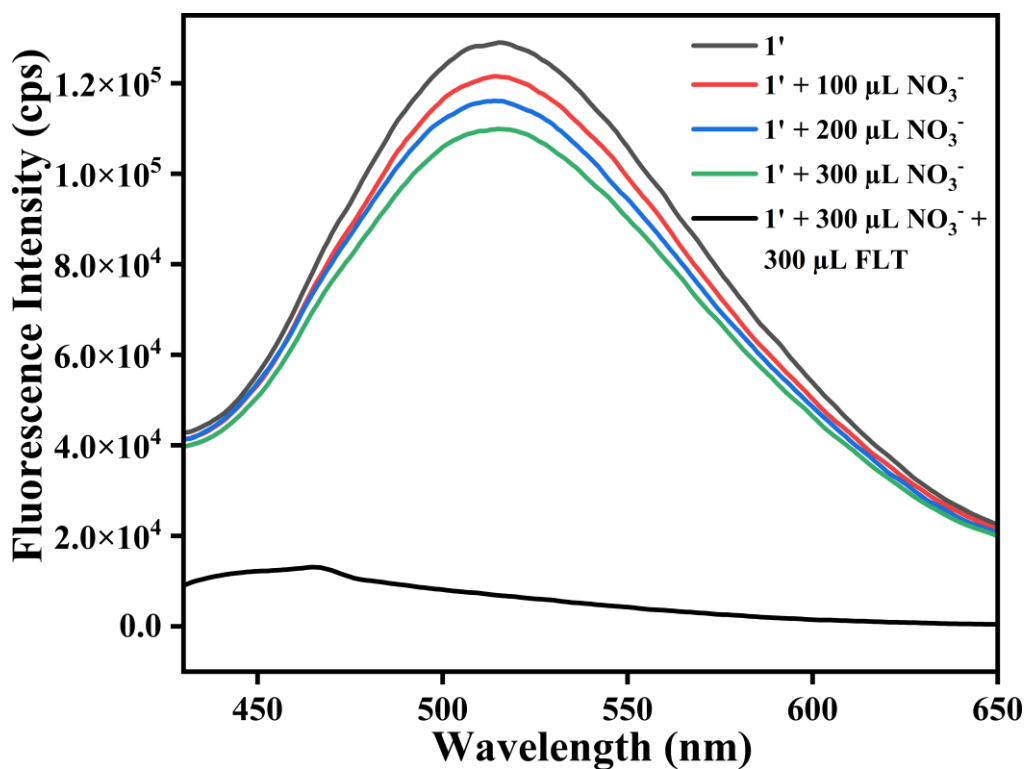

**Figure S47.** Fluorometric turn-off response of **1'** towards furaltadone (FLT) (300  $\mu\text{L}$ , 5 mM) in the presence of  $\text{NO}_3^-$  (300  $\mu\text{L}$ , 5 mM).

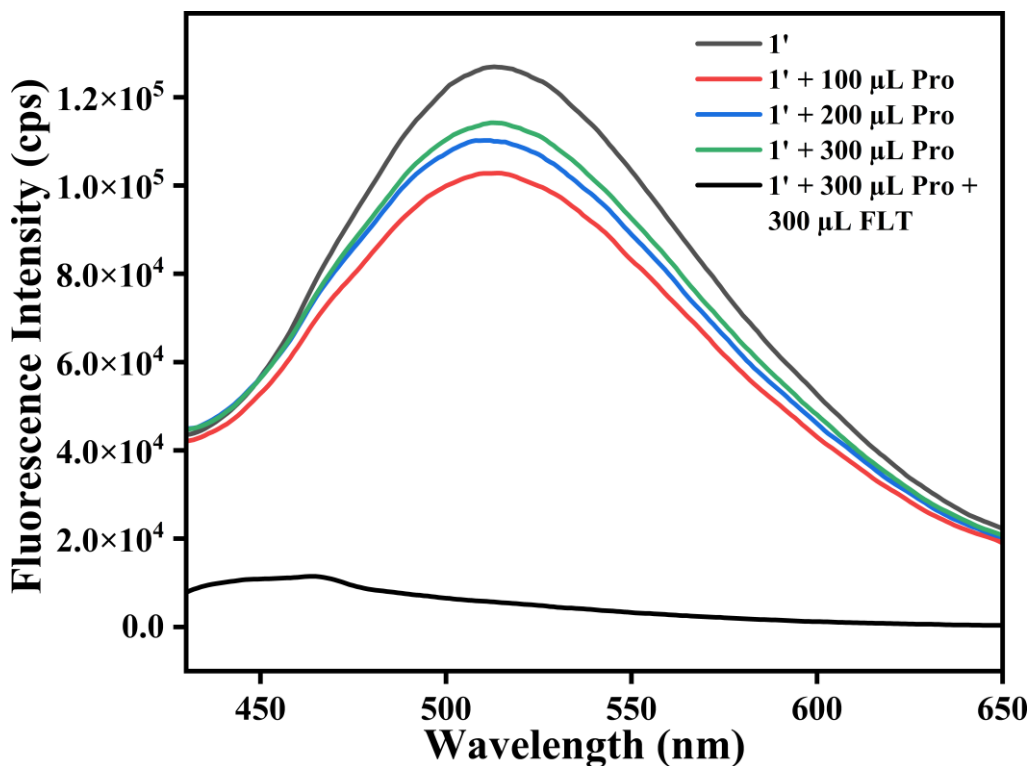

**Figure S48.** Fluorometric turn-off response of **1'** towards furaltadone (FLT) (300  $\mu\text{L}$ , 5 mM) in the presence of proline (Pro) (300  $\mu\text{L}$ , 5 mM).

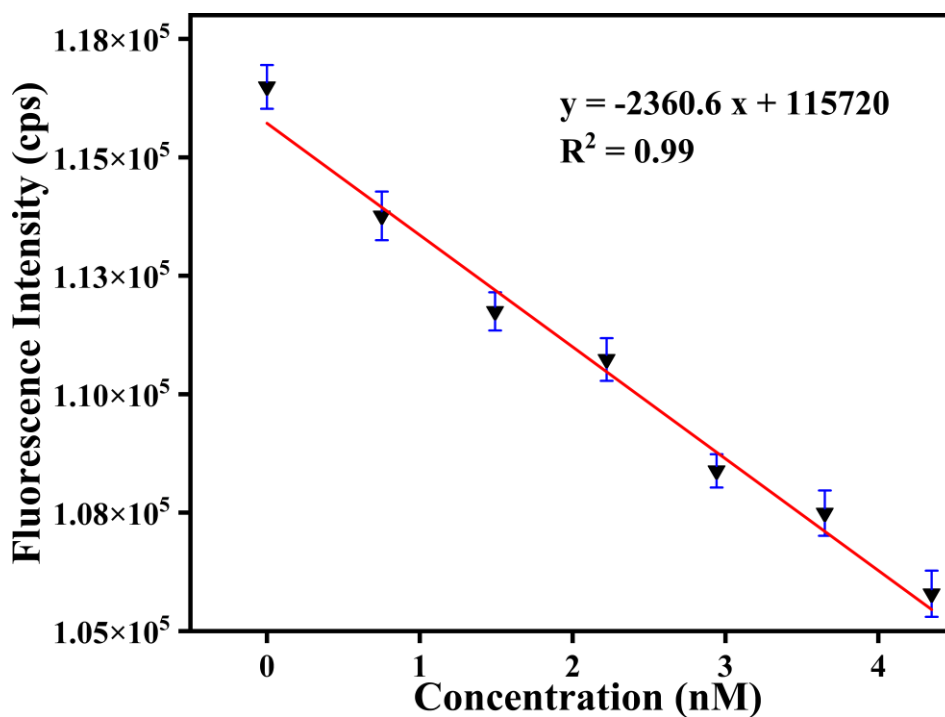

**Figure S49.** Change in the fluorescence intensity of **1'** in water as a function of concentration of furaltadone (FLT) (blue colour error bars signify the standard deviations of three individual measurements).

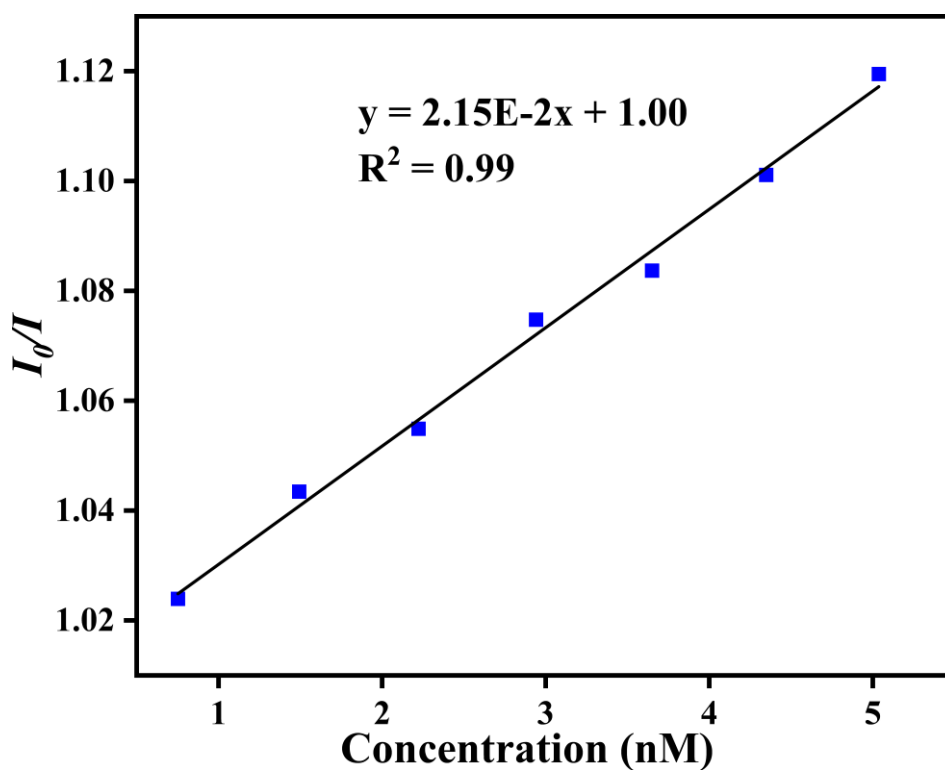

**Figure S50.** Stern-Volmer plot for the fluorescence quenching of **1'** in presence of furaltadone (FLT) in aqueous medium.

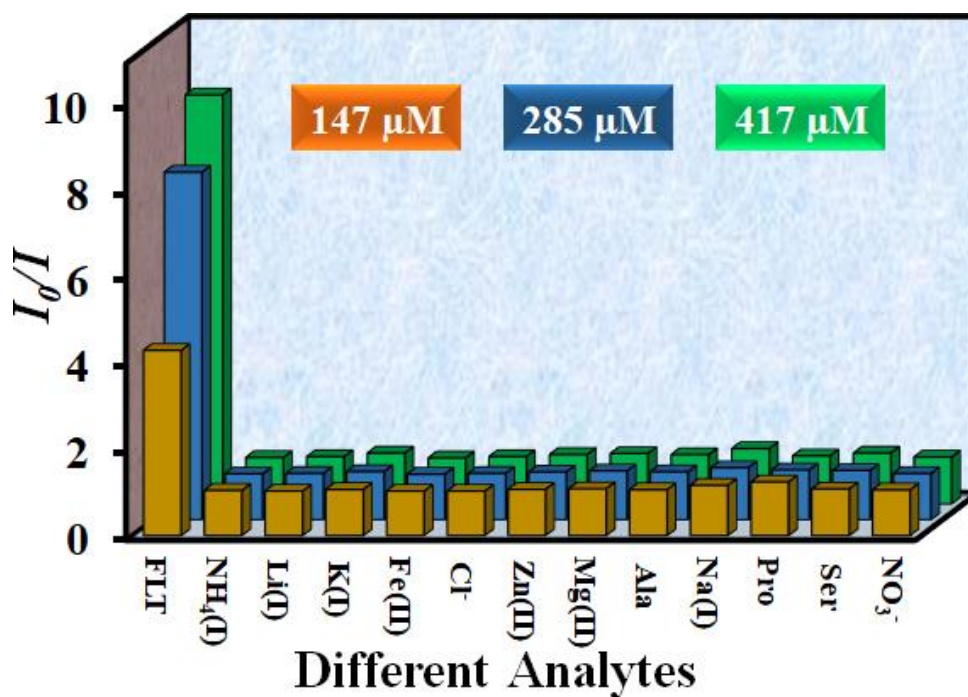

**Figure S51.** 3-D Stern-Volmer plots for furaltadone (FLT) sensing.

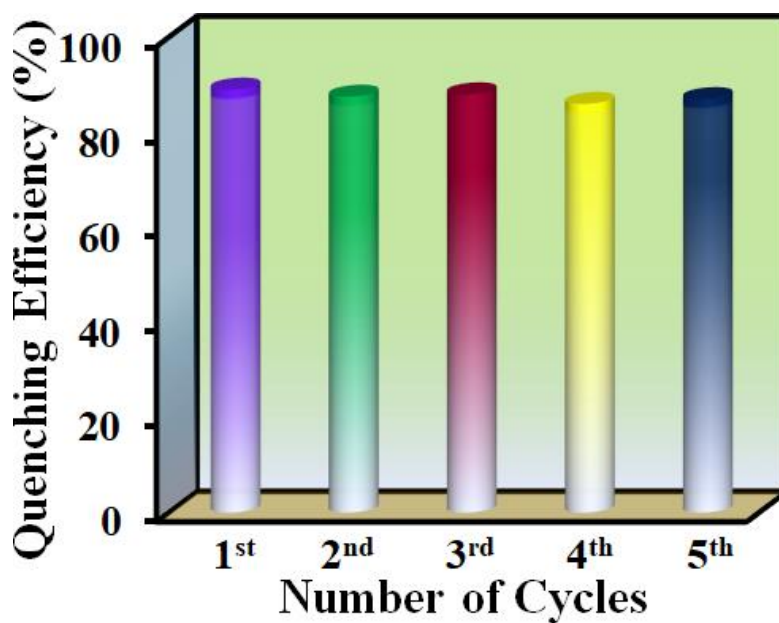

**Figure S52.** Reusability of the probe **1'** for furaltadone (FLT) sensing in aqueous medium.

**Table S5.** Fluorescence lifetimes of **1'** before and after the addition of furaltadone (FLT) solution ( $\lambda_{\text{ex}} = 375$  nm, pulsed diode laser).

| Volume of FLT Solution Added ( $\mu\text{L}$ ) | $\alpha_1$ | $\tau_1$ (ns) | $\langle \tau \rangle^*$ (ns) | $\chi^2$ |
|------------------------------------------------|------------|---------------|-------------------------------|----------|
| 0                                              | 1          | 12.5          | 15.20                         | 1.12     |
| 300                                            | 1          | 3.9           | 3.9                           | 0.95     |

$$\langle \tau \rangle^* = \alpha_1 \tau_1$$



**Table S6.** Evaluation of intra-day, inter-day accuracy and precision study of change in fluorescence intensity of **1'** after incremental addition of 5 mM aqueous solution of DNOC.

| Type of Precision | Amount of FLT Added ( $\mu\text{L}$ ) | Fluorescence Intensity |          |          | Average Intensity (cps) | SD    | Error  | RSD (%) |
|-------------------|---------------------------------------|------------------------|----------|----------|-------------------------|-------|--------|---------|
|                   |                                       |                        |          |          |                         |       |        |         |
| Intra Day         | 0                                     | 128845.5               | 129772.3 | 128809.9 | 129142.6                | 545.7 | 0.002  | 0.23    |
|                   | 50                                    | 56947.1                | 56489.1  | 56331.9  | 56589.4                 | 319.6 | -0.006 | -0.63   |
|                   | 100                                   | 29964.7                | 29901.0  | 29720.8  | 29862.2                 | 126.5 | -0.003 | -0.34   |
|                   | 150                                   | 16433.3                | 16230.6  | 16287.4  | 16317.1                 | 104.6 | -0.007 | -0.71   |
|                   | 200                                   | 10243.7                | 10191.2  | 10187.1  | 10207.3                 | 31.6  | -0.004 | -0.36   |
|                   | 250                                   | 7825.1                 | 7783.0   | 7559.8   | 7722.6                  | 142.6 | -0.013 | -1.31   |
|                   | 300                                   | 6244.2                 | 6237.6   | 6050.2   | 6177.3                  | 110.2 | -0.011 | -1.07   |
| Inter Day         | 0                                     | 128809.9               | 129344.2 | 128721.8 | 128958.6                | 336.8 | 0.001  | 0.12    |
|                   | 50                                    | 56331.9                | 56536.3  | 56215.1  | 56361.1                 | 162.6 | 0.001  | 0.05    |
|                   | 100                                   | 29720.8                | 29513.8  | 29471.7  | 29568.8                 | 133.4 | -0.005 | -0.51   |
|                   | 150                                   | 16287.4                | 16232.5  | 16037.8  | 16185.9                 | 131.2 | -0.006 | -0.62   |
|                   | 200                                   | 10187.1                | 10113.5  | 9963.4   | 10088.0                 | 114.0 | -0.010 | -0.97   |
|                   | 250                                   | 7559.8                 | 7667.5   | 7583.3   | 7603.5                  | 56.6  | 0.006  | 0.58    |
|                   | 300                                   | 6050.2                 | 6149.1   | 5946.3   | 6048.5                  | 101.4 | 0.000  | -0.03   |

**Table S7.** Comparison between the spiked and observed concentrations and recovery percentages of furaltadone (FLT) in serum and urine samples.

| Type of Sample | Spiked Conc. of FLT ( $\mu\text{M}$ ) | Observed Conc. of DNOC ( $\mu\text{M}$ ) | Recovery (%) |
|----------------|---------------------------------------|------------------------------------------|--------------|
| Serum          | 11.9                                  | 12.2                                     | 102.5        |
|                | 23.7                                  | 23.4                                     | 98.7         |
|                | 35.1                                  | 35.3                                     | 100.5        |
| Urine          | 11.9                                  | 11.8                                     | 99.1         |
|                | 23.7                                  | 23.2                                     | 97.8         |
|                | 35.1                                  | 34.9                                     | 98.9         |

**Table S8.** Comparison between the spiked and observed concentrations and recovery percentages of DNOC in different real water specimens.

| Type of Water | Spiked Conc. of DNOC ( $\mu\text{M}$ ) | Observed Conc. of DNOC ( $\mu\text{M}$ ) | Recovery (%) |
|---------------|----------------------------------------|------------------------------------------|--------------|
| Milli-Q Water | 11.9                                   | 11.6                                     | 97.5         |
|               | 23.7                                   | 23.2                                     | 97.9         |
|               | 35.1                                   | 35.2                                     | 100.3        |
| Tap Water     | 11.9                                   | 12.1                                     | 102.5        |
|               | 23.7                                   | 23.8                                     | 100.7        |
|               | 35.1                                   | 34.9                                     | 99.5         |
| Lake Water    | 11.9                                   | 11.6                                     | 97.6         |
|               | 23.7                                   | 23.9                                     | 100.8        |
|               | 35.1                                   | 35.3                                     | 100.6        |
| River Water   | 11.9                                   | 12.2                                     | 102.5        |
|               | 23.7                                   | 23.4                                     | 98.7         |
|               | 35.1                                   | 34.9                                     | 99.4         |

**Table S9.** Comparison between the spiked and observed concentrations and recovery percentages of furaltadone (FLT) in different real water specimens.

| Type of Water | Spiked Conc. of FLT ( $\mu\text{M}$ ) | Observed Conc. of FLT ( $\mu\text{M}$ ) | Recovery (%) |
|---------------|---------------------------------------|-----------------------------------------|--------------|
| Milli-Q Water | 11.9                                  | 12.1                                    | 102.0        |
|               | 23.7                                  | 23.8                                    | 100.5        |
|               | 35.1                                  | 34.9                                    | 99.5         |
| Tap Water     | 11.9                                  | 11.6                                    | 97.6         |
|               | 23.7                                  | 23.6                                    | 99.5         |
|               | 35.1                                  | 35.2                                    | 100.4        |
| Lake Water    | 11.9                                  | 11.7                                    | 98.2         |
|               | 23.7                                  | 23.4                                    | 98.7         |
|               | 35.1                                  | 35.3                                    | 100.6        |
| River Water   | 11.9                                  | 11.6                                    | 97.3         |
|               | 23.7                                  | 23.2                                    | 98.1         |
|               | 35.1                                  | 35.2                                    | 100.4        |

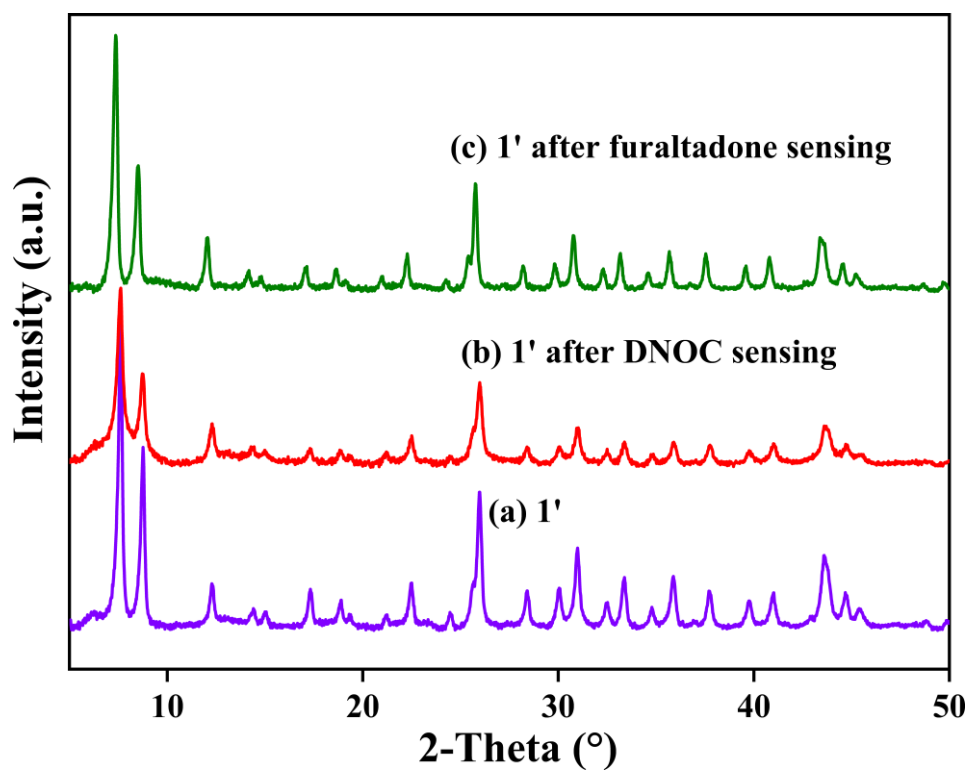

**Figure S53.** PXRD profiles of **1'** after DNOC and furaltadone (FLT) sensing.

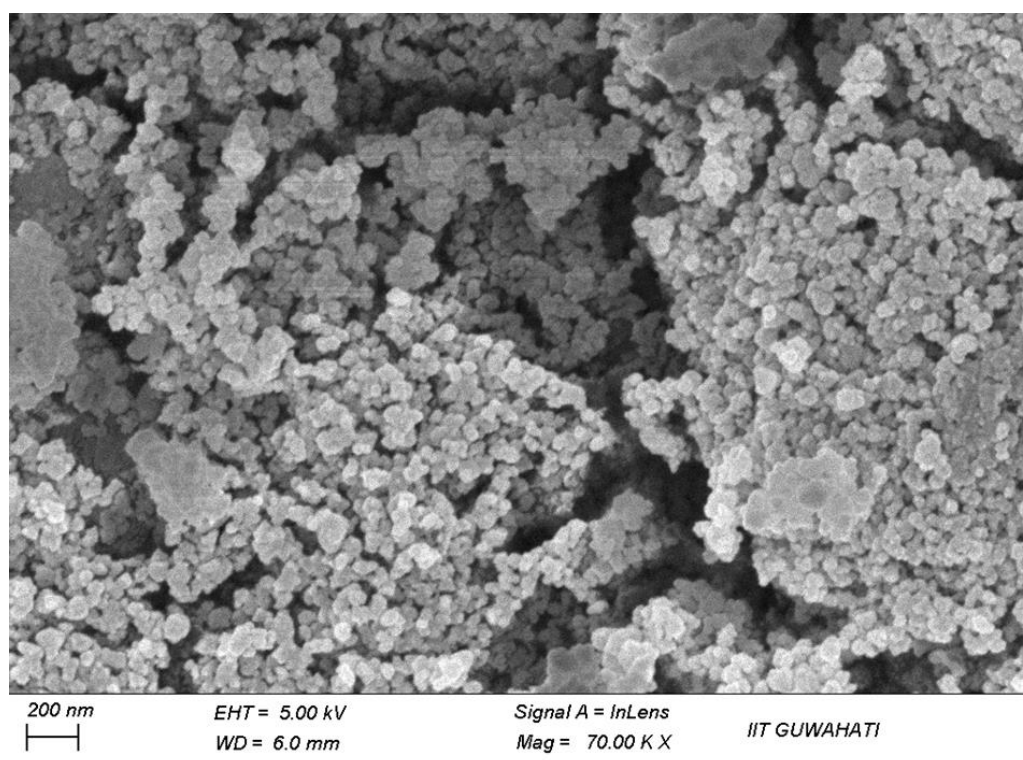

**Figure S54.** FE-SEM image of **1** after DNOC sensing.

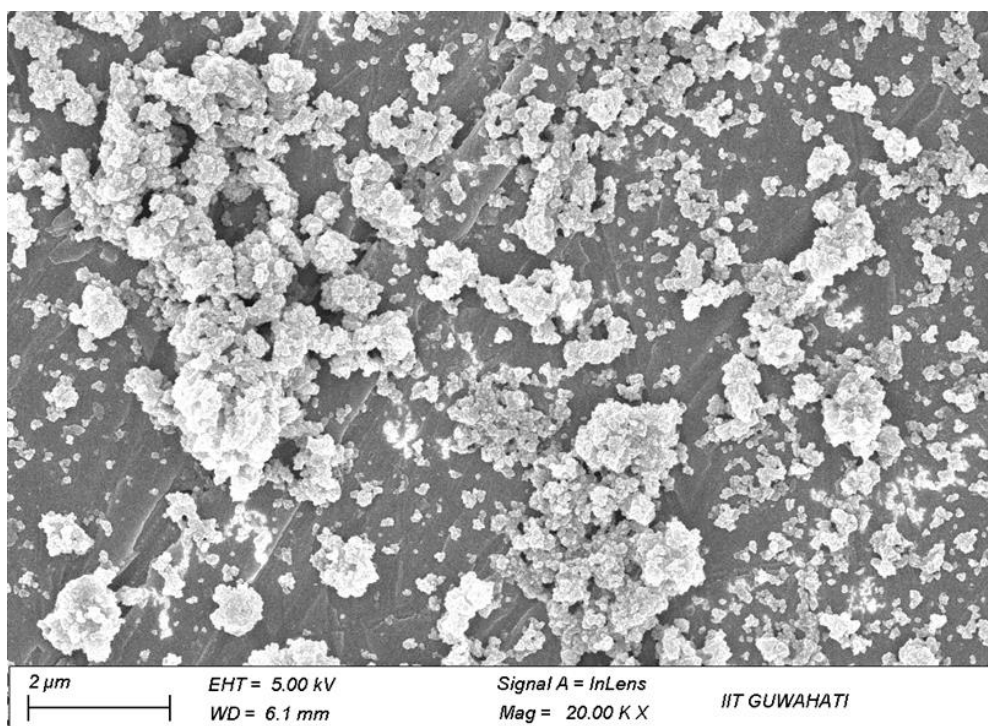

**Figure S55.** FE-SEM image of **1** after furaltadone (FLT) sensing.

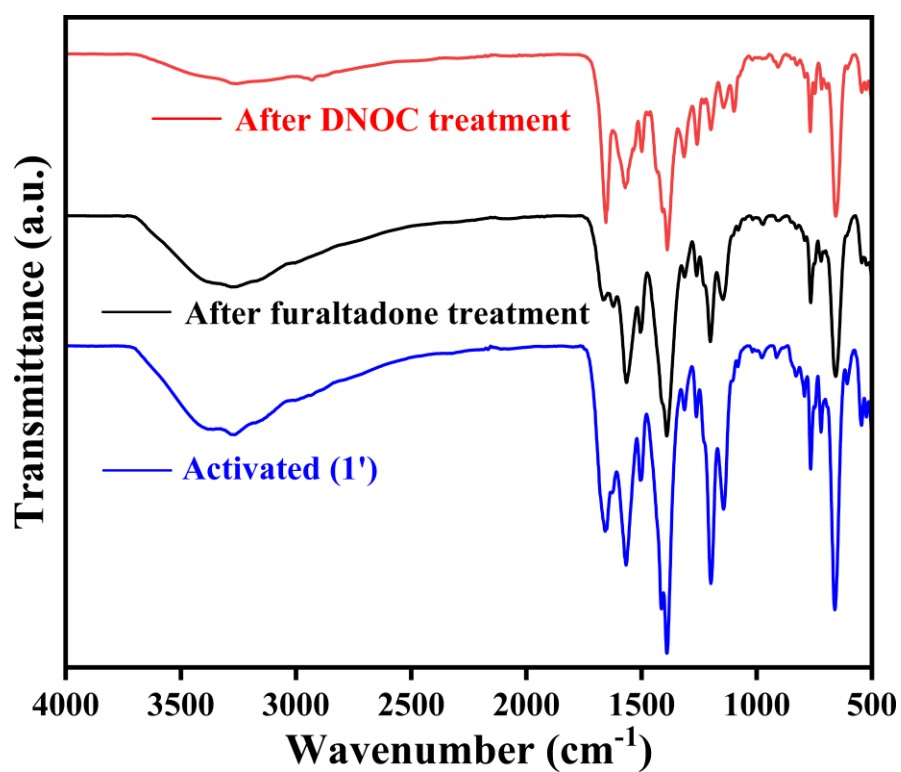

**Figure S56.** ATR-IR spectra of **1'** before and after treatment of DNOC and furaltadone (FLT).

**Table S10.** Comparison of the response time, detection limit and analyte used for the reported fluorescence based chemosensors of DNOC in the literature.

| Sl. No. | Sensor Material                                                | Type of Material  | Sensing Medium                            | Mode of Detection | Detection Limit     | Response Time | $K_{sv}$ ( $M^{-1}$ )                     | Ref.             |
|---------|----------------------------------------------------------------|-------------------|-------------------------------------------|-------------------|---------------------|---------------|-------------------------------------------|------------------|
| 1       | $[Zr_6O_4(OH)_4(C_{12}H_8N_4O_4)_4(CF_3CO_2)_2]$ ( <b>1'</b> ) | MOF               | water                                     | turn-off          | 0.5 nM              | 5 s           | $5 \times 10^7$                           | <b>this work</b> |
| 2       | Ethyleneglycol esters of 1-pyrene carboxylic acid              | organic-molecules | H <sub>2</sub> O : THF (99.9 : 0.1 (v/v)) | turn-off          | 101 ppb and 223 ppb | -             | $3.07 \times 10^4$ and $3.14 \times 10^4$ | 5                |
| 3       | 6,8-bis-(thiopen-2-yl)-1,3,7-triazapyrene                      | organic-molecule  | tris buffer                               | turn-off          | 2397 ppb            | -             | $0.35 \times 10^4$                        | 6                |

**Table S11.** Comparison of the response time, detection limit and analyte used for the reported fluorescence based chemosensors of furaltadone (FLT) in the literature.

| Sl. No. | Sensor Material                                                                           | Type of Material      | Sensing Medium            | Mode of Detection | Detection Limit             | Response Time | $K_{sv}$ ( $M^{-1}$ )                  | Ref.             |
|---------|-------------------------------------------------------------------------------------------|-----------------------|---------------------------|-------------------|-----------------------------|---------------|----------------------------------------|------------------|
| 1       | $[Zr_6O_4(OH)_4(C_{12}H_8N_4O_4)_4(CF_3CO_2)_2]$ ( <b>1'</b> )                            | MOF                   | water                     | turn-off          | 1.1 nM                      | 5 s           | $2.1 \times 10^7$                      | <b>this work</b> |
| 2       | Tryptophan-capped gold nanoclusters                                                       | nano-clusters         | buffer solution of pH 6.0 | turn-off          | 0.087 $\mu$ M               | 30s           | -                                      | 7                |
| 3       | Cu NCs@PVP                                                                                | nano-clusters         | PBS (pH = 6.0)            | turn-off          | 0.045 $\mu$ M               | 90 s          | -                                      | 8                |
| 4       | Histidine-Cu NCs                                                                          | nano-clusters         | PBS solution (pH = 8)     | turn-off          | 0.085 $\mu$ M               | 10 s          | $4.3 \times 10^3$                      | 9                |
| 5       | $Cd_3(L1)(MTC)_2(H_2O)_6$<br>L1 = (E)-4,4'-(ethene-1,2-diyl)bis(N-pyridin-3-yl)benzamide) | coordination polymers | water                     | turn-off          | 94 nM                       | -             | $2.2 \times 10^5$                      | 10               |
| 6       | $[M(L)(HCPG)_2(H_2O)_2]$ (M = Co, Ni)                                                     | coordination polymers | water                     | turn-off          | 0.7 $\mu$ M<br>0.22 $\mu$ M | 49 s<br>35 s  | $2.3 \times 10^4$<br>$4.1 \times 10^4$ | 11               |

### Details for structural modelling of Compound 1:

We used molecular mechanics to model the solvent-free structure of compound **1**, utilizing the universal force field (UFF) through the Forcite module in Biovia Materials Studio.<sup>12</sup> We began our homology modelling of the unknown structure of **1** with the reported MOF structure (MOR-2) as our reference point.<sup>13</sup>

### Simulated Crystallographic Information File (CIF) for Guest-Free Compound 1.

```
data_Compound 1
_audit_creation_date      2024-09-04
_audit_creation_method    'Materials Studio'
_symmetry_space_group_name_H-M  'P-4'
_symmetry_Int_Tables_number  81
_symmetry_cell_setting    tetragonal
loop_
_symmetry_equiv_pos_as_xyz
  x,y,z
  -x,-y,z
  y,-x,-z
  -y,x,-z
_cell_length_a            14.6770
_cell_length_b            14.6770
_cell_length_c            20.7940
_cell_angle_alpha         90.0000
_cell_angle_beta          90.0000
_cell_angle_gamma         90.0000
loop_
_atom_site_label
_atom_site_type_symbol
_atom_site_fract_x
_atom_site_fract_y
_atom_site_fract_z
```

\_atom\_site\_U\_iso\_or\_equiv

\_atom\_site\_adp\_type

\_atom\_site\_occupancy

|     |   |         |         |         |         |      |      |
|-----|---|---------|---------|---------|---------|------|------|
| O1  | O | 1.00304 | 0.11619 | 0.05899 | 0.00500 | Uiso | 1.00 |
| O2  | O | 0.17109 | 0.16303 | 0.08801 | 0.08000 | Uiso | 1.00 |
| O3  | O | 0.08985 | 0.08885 | 0.16728 | 0.08000 | Uiso | 1.00 |
| C4  | C | 0.15209 | 0.14683 | 0.14840 | 0.08000 | Uiso | 1.00 |
| C5  | C | 0.20513 | 0.19867 | 0.20022 | 0.08000 | Uiso | 1.00 |
| C6  | C | 0.16474 | 0.21513 | 0.26102 | 0.08000 | Uiso | 1.00 |
| C7  | C | 0.29496 | 0.23377 | 0.19082 | 0.08000 | Uiso | 1.00 |
| N8  | N | 0.34693 | 0.21232 | 0.13440 | 0.10000 | Uiso | 0.50 |
| O9  | O | 0.49816 | 0.61626 | 0.55897 | 0.00500 | Uiso | 1.00 |
| O10 | O | 0.66241 | 0.67074 | 0.58759 | 0.08000 | Uiso | 1.00 |
| O11 | O | 0.58582 | 0.59276 | 0.66713 | 0.08000 | Uiso | 1.00 |
| C12 | C | 0.64427 | 0.65434 | 0.64794 | 0.08000 | Uiso | 1.00 |
| C13 | C | 0.69559 | 0.70886 | 0.69914 | 0.08000 | Uiso | 1.00 |
| C14 | C | 0.68288 | 0.68960 | 0.76512 | 0.08000 | Uiso | 1.00 |
| C15 | C | 0.75964 | 0.77867 | 0.68409 | 0.08000 | Uiso | 1.00 |
| N16 | N | 0.77478 | 0.80653 | 0.61904 | 0.10000 | Uiso | 0.50 |
| O17 | O | 0.88401 | 1.00296 | 0.05860 | 0.00500 | Uiso | 1.00 |
| O18 | O | 0.83763 | 0.17074 | 0.08863 | 0.08000 | Uiso | 1.00 |
| O19 | O | 0.91509 | 0.09180 | 0.16753 | 0.08000 | Uiso | 1.00 |
| C20 | C | 0.85623 | 0.15300 | 0.14893 | 0.08000 | Uiso | 1.00 |
| C21 | C | 0.80562 | 0.20532 | 0.20112 | 0.08000 | Uiso | 1.00 |
| C22 | C | 0.82508 | 0.19196 | 0.26669 | 0.08000 | Uiso | 1.00 |
| C23 | C | 0.73713 | 0.26890 | 0.18656 | 0.08000 | Uiso | 1.00 |
| O24 | O | 0.38416 | 0.49803 | 0.55880 | 0.00500 | Uiso | 1.00 |
| O25 | O | 0.33449 | 0.66772 | 0.58823 | 0.08000 | Uiso | 1.00 |
| O26 | O | 0.41163 | 0.58913 | 0.66735 | 0.08000 | Uiso | 1.00 |
| C27 | C | 0.35284 | 0.65028 | 0.64840 | 0.08000 | Uiso | 1.00 |

|      |    |         |          |          |         |      |      |
|------|----|---------|----------|----------|---------|------|------|
| C28  | C  | 0.30095 | 0.70194  | 0.69997  | 0.08000 | Uiso | 1.00 |
| C29  | C  | 0.28524 | 0.66157  | 0.76008  | 0.08000 | Uiso | 1.00 |
| C30  | C  | 0.26491 | 0.78979  | 0.69017  | 0.08000 | Uiso | 1.00 |
| O31  | O  | 0.25284 | 0.07150  | -0.00471 | 0.08000 | Uiso | 0.50 |
| O32  | O  | 0.08569 | 0.24887  | 0.00557  | 0.08000 | Uiso | 0.50 |
| Zr33 | Zr | 0.11610 | 0.11020  | -0.00006 | 0.00500 | Uiso | 1.00 |
| C34  | C  | 0.70986 | 1.00807  | -0.00770 | 0.00000 | Uiso | 1.00 |
| O35  | O  | 0.74993 | 0.58435  | 0.49748  | 0.08000 | Uiso | 0.50 |
| O36  | O  | 0.57280 | 0.75256  | 0.50232  | 0.08000 | Uiso | 0.50 |
| Zr37 | Zr | 0.61109 | 0.61499  | 0.49984  | 0.00500 | Uiso | 1.00 |
| C38  | C  | 0.20915 | 0.49348  | 0.49632  | 0.00000 | Uiso | 1.00 |
| C39  | C  | 0.10927 | 0.49266  | 0.49488  | 0.00000 | Uiso | 1.00 |
| C40  | C  | 0.61053 | 0.00931  | -0.01118 | 0.00000 | Uiso | 1.00 |
| H41  | H  | 0.09670 | 0.19019  | 0.27084  | 0.00000 | Uiso | 1.00 |
| H42  | H  | 0.33467 | 0.15167  | 0.10962  | 0.00000 | Uiso | 1.00 |
| N43  | N  | 0.42215 | 0.26666  | 0.11779  | 0.00000 | Uiso | 1.00 |
| H44  | H  | 0.63550 | 0.63705  | 0.77983  | 0.00000 | Uiso | 1.00 |
| H45  | H  | 0.72021 | 0.83630  | 0.59464  | 0.00000 | Uiso | 1.00 |
| N46  | N  | 0.86332 | 0.82360  | 0.59668  | 0.00000 | Uiso | 1.00 |
| H47  | H  | 0.87824 | 0.14449  | 0.28022  | 0.00000 | Uiso | 1.00 |
| H48  | H  | 0.72001 | 0.28095  | 0.13734  | 0.00000 | Uiso | 1.00 |
| H49  | H  | 0.31000 | 0.59292  | 0.76769  | 0.00000 | Uiso | 1.00 |
| H50  | H  | 0.27674 | 0.82432  | 0.64499  | 0.00000 | Uiso | 1.00 |
| F51  | F  | 0.07873 | 0.53324  | 0.55076  | 0.00000 | Uiso | 1.00 |
| F52  | F  | 0.07708 | 0.40409  | 0.49130  | 0.00000 | Uiso | 1.00 |
| F53  | F  | 0.08051 | 0.54155  | 0.44178  | 0.00000 | Uiso | 1.00 |
| F54  | F  | 0.57945 | -0.01933 | 0.04791  | 0.00000 | Uiso | 1.00 |
| F55  | F  | 0.58253 | -0.04945 | -0.05924 | 0.00000 | Uiso | 1.00 |
| F56  | F  | 0.57948 | 0.09625  | -0.02424 | 0.00000 | Uiso | 1.00 |
| C57  | C  | 0.07266 | 0.23704  | 0.60034  | 0.00000 | Uiso | 1.00 |



|      |    |         |         |         |         |      |      |
|------|----|---------|---------|---------|---------|------|------|
| C58  | C  | 0.76207 | 0.48626 | 0.91971 | 0.00000 | Uiso | 1.00 |
| C59  | C  | 1.01944 | 0.78578 | 0.57875 | 0.00000 | Uiso | 1.00 |
| H60  | H  | 0.91256 | 0.69470 | 0.61725 | 0.00000 | Uiso | 1.00 |
| C61  | C  | 0.29792 | 0.43813 | 0.93719 | 0.00000 | Uiso | 1.00 |
| N62  | N  | 0.27642 | 1.08020 | 0.44204 | 0.00000 | Uiso | 1.00 |
| C63  | C  | 0.22613 | 1.15364 | 0.45811 | 0.00000 | Uiso | 1.00 |
| C64  | C  | 0.13561 | 1.13652 | 0.44628 | 0.00000 | Uiso | 1.00 |
| N65  | N  | 0.12864 | 1.05174 | 0.42319 | 0.00000 | Uiso | 1.00 |
| H66  | H  | 0.48435 | 0.16974 | 0.06125 | 0.00000 | Uiso | 1.00 |
| N67  | N  | 0.63266 | 0.26998 | 0.02652 | 0.00000 | Uiso | 1.00 |
| C68  | C  | 0.68747 | 0.34340 | 0.02379 | 0.00000 | Uiso | 1.00 |
| C69  | C  | 0.64896 | 0.41409 | 0.05789 | 0.00000 | Uiso | 1.00 |
| N70  | N  | 0.56964 | 0.38505 | 0.08241 | 0.00000 | Uiso | 1.00 |
| H71  | H  | 0.75362 | 0.34345 | 0.00113 | 0.00000 | Uiso | 1.00 |
| H72  | H  | 0.67793 | 0.48090 | 0.06592 | 0.00000 | Uiso | 1.00 |
| H73  | H  | 0.74662 | 0.78433 | 0.47813 | 0.00000 | Uiso | 1.00 |
| H74  | H  | 0.92098 | 0.81745 | 0.45371 | 0.00000 | Uiso | 1.00 |
| H75  | H  | 0.67095 | 0.50262 | 0.58614 | 0.00000 | Uiso | 1.00 |
| H76  | H  | 0.57833 | 0.52500 | 0.88830 | 0.00000 | Uiso | 1.00 |
| H77  | H  | 0.98146 | 0.06988 | 0.59160 | 0.00000 | Uiso | 1.00 |
| H78  | H  | 0.82839 | 1.00428 | 0.08540 | 0.00000 | Uiso | 1.00 |
| Zr79 | Zr | 0.00000 | 0.00000 | 0.11528 | 0.00500 | Uiso | 1.00 |
| Zr80 | Zr | 0.50000 | 0.50000 | 0.61534 | 0.00500 | Uiso | 1.00 |

loop\_

\_geom\_bond\_atom\_site\_label\_1

\_geom\_bond\_atom\_site\_label\_2

\_geom\_bond\_distance

\_geom\_bond\_site\_symmetry\_2

\_ccdc\_geom\_bond\_type

O1 Zr33 2.065 4\_655 S

|     |      |       |       |   |
|-----|------|-------|-------|---|
| O1  | Zr33 | 2.066 | 1_655 | S |
| O1  | Zr79 | 2.069 | 1_655 | S |
| O2  | C4   | 1.308 | .     | A |
| O2  | Zr33 | 2.146 | .     | S |
| O3  | C4   | 1.309 | .     | A |
| O3  | Zr79 | 2.147 | .     | S |
| C4  | C5   | 1.532 | .     | S |
| C5  | C6   | 1.417 | .     | A |
| C5  | C7   | 1.429 | .     | A |
| C6  | C30  | 1.417 | 4_656 | A |
| C6  | H41  | 1.083 | .     | S |
| C7  | N8   | 1.434 | .     | S |
| C7  | C29  | 1.421 | 4_656 | A |
| N8  | H42  | 1.044 | .     | S |
| N8  | N43  | 1.405 | .     | S |
| O9  | Zr37 | 2.064 | .     | S |
| O9  | Zr80 | 2.070 | .     | S |
| O9  | Zr37 | 2.064 | 4_656 | S |
| O10 | C12  | 1.305 | .     | A |
| O10 | Zr37 | 2.137 | .     | S |
| O11 | C12  | 1.308 | .     | A |
| O11 | Zr80 | 2.145 | .     | S |
| C12 | C13  | 1.530 | .     | S |
| C13 | C14  | 1.413 | .     | A |
| C13 | C15  | 1.425 | .     | A |
| C14 | C23  | 1.413 | 4_656 | A |
| C14 | H44  | 1.083 | .     | S |
| C15 | N16  | 1.430 | .     | S |
| C15 | C22  | 1.420 | 4_656 | A |
| N16 | H45  | 1.044 | .     | S |

|     |      |       |       |   |
|-----|------|-------|-------|---|
| N16 | N46  | 1.403 | .     | S |
| O17 | Zr33 | 2.061 | 2_665 | S |
| O17 | Zr79 | 2.071 | 1_665 | S |
| O17 | Zr33 | 2.061 | 4_665 | S |
| O17 | H78  | 0.989 | .     | S |
| O18 | C20  | 1.310 | .     | A |
| O18 | Zr33 | 2.150 | 4_655 | S |
| O19 | C20  | 1.305 | .     | A |
| O19 | Zr79 | 2.133 | 1_655 | S |
| C20 | C21  | 1.523 | .     | S |
| C21 | C22  | 1.407 | .     | A |
| C21 | C23  | 1.405 | .     | A |
| C22 | C15  | 1.420 | 3_566 | A |
| C22 | H47  | 1.083 | .     | S |
| C23 | C14  | 1.413 | 3_566 | A |
| C23 | H48  | 1.069 | .     | S |
| O24 | Zr37 | 2.059 | 4_656 | S |
| O24 | Zr80 | 2.067 | .     | S |
| O24 | Zr37 | 2.064 | 2_665 | S |
| O24 | H75  | 0.989 | 2_665 | S |
| O25 | C27  | 1.305 | .     | A |
| O25 | Zr37 | 2.143 | 4_656 | S |
| O26 | C27  | 1.306 | .     | A |
| O26 | Zr80 | 2.136 | .     | S |
| C27 | C28  | 1.518 | .     | S |
| C28 | C29  | 1.402 | .     | A |
| C28 | C30  | 1.408 | .     | A |
| C29 | C7   | 1.421 | 3_566 | A |
| C29 | H49  | 1.083 | .     | S |
| C30 | C6   | 1.417 | 3_566 | A |

|      |      |       |       |   |
|------|------|-------|-------|---|
| C30  | H50  | 1.082 | .     | S |
| O31  | Zr33 | 2.088 | .     | S |
| O31  | C34  | 1.291 | 2_665 | A |
| O32  | Zr33 | 2.087 | .     | S |
| O32  | C34  | 1.291 | 3_465 | A |
| Zr33 | O17  | 2.061 | 2_665 | S |
| Zr33 | O18  | 2.150 | 3_565 | S |
| Zr33 | O1   | 2.065 | 3_565 | S |
| Zr33 | O1   | 2.066 | 1_455 | S |
| Zr33 | O17  | 2.061 | 3_465 | S |
| C34  | O31  | 1.291 | 2_665 | A |
| C34  | C40  | 1.460 | 1_565 | S |
| C34  | O32  | 1.291 | 4_665 | A |
| O35  | Zr37 | 2.087 | .     | S |
| O35  | C38  | 1.291 | 2_665 | A |
| O36  | Zr37 | 2.097 | .     | S |
| O36  | C38  | 1.293 | 3_566 | A |
| Zr37 | O25  | 2.143 | 3_566 | S |
| Zr37 | O24  | 2.059 | 3_566 | S |
| Zr37 | O24  | 2.064 | 2_665 | S |
| Zr37 | O9   | 2.064 | 3_566 | S |
| C38  | C39  | 1.466 | .     | S |
| C38  | O35  | 1.291 | 2_665 | A |
| C38  | O36  | 1.293 | 4_656 | A |
| C39  | F51  | 1.381 | .     | S |
| C39  | F52  | 1.385 | .     | S |
| C39  | F53  | 1.383 | .     | S |
| C40  | C34  | 1.460 | 1_545 | S |
| C40  | F54  | 1.376 | .     | S |
| C40  | F55  | 1.383 | .     | S |

|     |     |       |       |   |
|-----|-----|-------|-------|---|
| C40 | F56 | 1.382 | .     | S |
| N43 | C58 | 1.293 | 3_566 | D |
| N46 | C57 | 1.297 | 2_665 | D |
| C57 | N46 | 1.297 | 2_665 | D |
| C57 | C59 | 1.463 | 2_665 | S |
| C57 | H60 | 1.084 | 2_665 | S |
| C58 | N43 | 1.293 | 4_656 | D |
| C58 | C61 | 1.462 | 2_665 | S |
| C58 | H66 | 1.077 | 4_656 | S |
| C59 | C57 | 1.463 | 2_665 | S |
| C59 | N62 | 1.347 | 3_566 | D |
| C59 | N65 | 1.343 | 3_566 | S |
| H60 | C57 | 1.084 | 2_665 | S |
| C61 | C58 | 1.462 | 2_665 | S |
| C61 | N67 | 1.348 | 3_566 | D |
| C61 | N70 | 1.347 | 3_566 | S |
| N62 | C63 | 1.348 | .     | S |
| N62 | C59 | 1.347 | 4_656 | D |
| C63 | C64 | 1.374 | .     | D |
| C63 | H73 | 1.078 | 2_675 | S |
| C64 | N65 | 1.338 | .     | S |
| C64 | H74 | 1.082 | 2_675 | S |
| N65 | C59 | 1.343 | 4_656 | S |
| N65 | H77 | 1.037 | 3_576 | S |
| H66 | C58 | 1.077 | 3_566 | S |
| N67 | C68 | 1.346 | .     | S |
| N67 | C61 | 1.348 | 4_656 | D |
| C68 | C69 | 1.378 | .     | D |
| C68 | H71 | 1.079 | .     | S |
| C69 | N70 | 1.341 | .     | S |

C69 H72 1.082 . S  
 N70 C61 1.347 4\_656 S  
 N70 H76 1.044 3\_566 S  
 H73 C63 1.078 2\_675 S  
 H74 C64 1.082 2\_675 S  
 H75 O24 0.989 2\_665 S  
 H76 N70 1.044 4\_656 S  
 H77 N65 1.037 4\_756 S  
 Zr79 O3 2.147 2 S  
 Zr79 O17 2.071 2\_665 S  
 Zr79 O17 2.071 1\_445 S  
 Zr79 O1 2.069 1\_455 S  
 Zr79 O1 2.069 2\_655 S  
 Zr79 O19 2.133 1\_455 S  
 Zr79 O19 2.133 2\_655 S  
 Zr80 O11 2.145 2\_665 S  
 Zr80 O26 2.136 2\_665 S  
 Zr80 O9 2.070 2\_665 S  
 Zr80 O24 2.067 2\_665 S

### **References:**

1. O. K. Farha, A. Özgür Yazaydın, I. Eryazici, C. D. Malliakas, B. G. Hauser, M. G. Kanatzidis, S. T. Nguyen, R. Q. Snurr and J. T. Hupp, *Nat. Chem.*, 2010, **2**, 944-948.
2. C. A. Parker and W. Rees, *Analyst*, 1960, **85**, 587-600.
3. S. Nandi, E. Sharma, V. Trivedi and S. Biswas, *Inorg. Chem.*, 2018, **57**, 15149-15157.
4. J. H. Cavka, S. Jakobsen, U. Olsbye, N. Guillou, C. Lamberti, S. Bordiga and K. P. Lillerud, *J. Am. Chem. Soc.*, 2008, **130**, 13850-13851.
5. I. Kovalev, L. Sadieva, O. Taniya, D. Kopchuk, G. Zyryanov, E. Ulomsky, V. Rusinov and O. Chupakhin, *Chimica Techno Acta.*, 2021, **8**.
6. I. A. Lavrinchenko, T. D. Moseev, M. V. Varaksin, G. V. Zyryanov, O. S. Taniya, A. N. Tsmokalyuk, O. P. Demidov, I. V. Borovlev, V. N. Charushin and O. N. Chupakhin, *New J Chem.*, 2022, **46**, 5121-5128.

7. Z. Cai, H. Li, X. Yang, M. Zhang, J. Guo, Y. Su and T. Liu, *Spectrochim. Acta A Mol. Biomol. Spectrosc.*, 2024, **308**, 123748.
8. Z.-f. Cai, X.-s. Wang, H.-y. Li, P.-l. Cao, X.-r. Han, P.-y. Guo, F.-y. Cao, J.-x. Liu, X.-x. Sun and T. Li, *Spectrochim. Acta A Mol. Biomol. Spectrosc.*, 2022, **279**, 121408.
9. S. Zhang, M.-l. Jin, Y.-x. Gao, W.-q. Li, X.-y. Wang, X.-x. Li, J.-q. Qiao and Y. Peng, *Chem. Pap.*, 2022, **76**, 7855-7863.
10. J. Geng, J. Sun, H. Lin and X. Wang, *New J. Chem.*, 2023, **47**, 9701-9707.
11. J. Geng, Y. Chen, S. Xie, H. Lin and X. Wang, *Inorg. Chem.*, 2023, **62**, 5158-5167.
12. A. K. Rappé, C. J. Casewit, K. Colwell, W. A. Goddard III and W. M. Skiff, *J. Am. Chem. Soc.*, 1992, **114**, 10024-10035.
13. S. Rapti, D. Sarma, S. A. Diamantis, E. Skliri, G. S. Armatas, A. C. Tsipis, Y. S. Hassan, M. Alkordi, C. D. Malliakas and M. G. Kanatzidis, *J. Mater. Chem. A*, 2017, **5**, 14707-14719.
